# Supplementary material for: A Global Regulatory Network for Dysregulated Gene Expression and Abnormal Metabolic Signaling in Immune Cells in the Microenvironment of Graves’ Disease and Hashimoto’s Thyroiditis
Source: Front Immunol. 2022 May 26;13:879824. doi: 10.3389/fimmu.2022.879824 (PMC9204353; doi:10.3389/fimmu.2022.879824)
Supplement: Supplementary file 1 [file Table_1.xlsx]

## Sheet: Sheet1
Sample	Group	TSH mIU/L	FT4 pmol/L	FT3 pmol/L	TG-Ab IU/ml	A-TPO IU/ml	TRAbl IU/L
N1	Control	2.62	14.44	5.13	16.39	7.28	0.8
G1	Graves	1.57	6.15	2.83	338.1	110.1	7.94
G2	Graves	0.315	3.09	4.67	30.97	133.2	28.28
H1	CLT	1.59	14.7	3.48	1352	262.8	0.3
H2	CLT	2.54	15.43	4.41	362.8	422.4	0.8
