# Supplementary material for: A Global Regulatory Network for Dysregulated Gene Expression and Abnormal Metabolic Signaling in Immune Cells in the Microenvironment of Graves’ Disease and Hashimoto’s Thyroiditis
Source: Front Immunol. 2022 May 26;13:879824. doi: 10.3389/fimmu.2022.879824 (PMC9204353; doi:10.3389/fimmu.2022.879824)
Supplement: Supplementary file 3 [file Table_3.xlsx]

## Sheet: Sheet1
Group	Gene	Forward primer(5’-3’)	Reverse primer(5’-3‘)	Accession
HT	IL16	ACACCCACTGCTTAAGAGGC	TGTGGCCATGGTTCTCACTC	NM_001172128.2
HT	CXCL13	GCCTCTCTCCAGTCCAAGGT	CATTCCCACGGGGCAAGAT	NM_001371558.1
HT	ICOS	GCAGCCTTTGTTGTAGTCTGC	TGGCTGTGTTCACTGCTCTC	NM_012092.4
HT	CCR7	GCAACAAGGCCATCAAGGTG	GAGCTCACAGGTGCTACTGG	NM_001301714.2
HT	TNF	GCTGCACTTTGGAGTGATCG	TCACTCGGGGTTCGAGAAGA	NM_000594.4
HT	CD70	GGTTGTACCATTGCCTCCCA	CACCCACTGCACTCCAAAGA	NM_001252.5
HT	CD27	GGCTGCTCAGTGTGATCCTT	TCAGCATTGGCAGTGATGGT	NM_001242.5
HT	LAT	CATCCTGGAGCGGCTAAGAC	TCAGCTCCTGCAGATTCTCG	NM_001014987.2
HT	CD4	CCTGGTAGTAGCCCCTCAGT	AGACAGTGCATGTCCAGGTG	NM_000616.5
HT	CCL21	CTACCGGAAGCAGGAACCAA	TGGGGATGGTGTCTTGTCCA	NM_002989.4
GD	IL16	GAATCTCAAGGCCCAGTGCT	TTGAGCGAGAACCCTGTGTC	NM_004513.6
GD	FGFR1	ACCAAACCGTATGCCCGTAG	CCCACTGGAAGGGCATTTGA	NM_001174063.2
