# Supplementary material for: A Global Regulatory Network for Dysregulated Gene Expression and Abnormal Metabolic Signaling in Immune Cells in the Microenvironment of Graves’ Disease and Hashimoto’s Thyroiditis
Source: Front Immunol. 2022 May 26;13:879824. doi: 10.3389/fimmu.2022.879824 (PMC9204353; doi:10.3389/fimmu.2022.879824)
Supplement: Supplementary file 4 [file Table_4.xlsx]

## Sheet: Sheet1
Group	Gene	logFC	AveExpr	t	P.Value	B
HT	MS4A1	8.08509	4.93101	29.5903	0.0175538	-39.0347
HT	AC242842.3	-6.1983	1.60705	-9.404e+16	5.63037e-19	34.628
HT	FDCSP	5.90081	3.47483	36.686	0.0139673	-38.5914
HT	IL16	5.795	3.40428	47.932	0.0105101	-38.0399
HT	SEPTIN1	5.69506	3.33766	24.827	0.0211541	-39.3964
HT	SPIB	5.61179	3.28215	15.1992	0.0356193	-40.4062
HT	CCL19	5.54291	4.82119	11.1289	0.0495562	-41.0455
HT	CD22	5.4923	3.20249	17.7449	0.0302218	-40.0879
HT	STAP1	5.4923	3.20249	17.7449	0.0302218	-40.0879
HT	TRAT1	5.30248	3.07594	35.3111	0.0145464	-38.6702
HT	CXCL13	5.17848	4.57824	13.9768	0.0389311	-40.5784
HT	FBH1	-5.10997	1.24428	-7.75279e+16	6.91444e-19	34.2327
HT	OR2I1P	5.05425	2.91045	58.0629	0.00857098	-37.6443
HT	AC087721.2	5.05253	2.90931	13.3132	0.040991	-40.6782
HT	POU2F2	5.03759	2.89935	85.2677	0.005695	-36.8514
HT	CORO1A	5.00567	5.68542	17.8141	0.0300971	-40.0798
HT	CD19	4.93705	2.83232	44.9884	0.0112431	-38.1707
HT	MARCHF1	4.87515	2.79105	841.881	0.000498221	-32.1253
HT	LPIN3	-4.81027	1.14438	-7.2981e+16	7.37369e-19	34.1087
HT	CD79A	4.65346	5.45062	13.2064	0.0413424	-40.6948
HT	LY9	4.64952	2.64064	12.4628	0.04396	-40.8136
HT	RAD54L2	4.64952	2.64064	12.4628	0.04396	-40.8136
HT	FCRL5	4.61499	2.61761	14.647	0.037045	-40.4822
HT	IGKC	4.57497	2.59093	15.5787	0.0346996	-40.3555
HT	AIM2	4.53265	2.56272	25.6331	0.0204478	-39.3306
HT	AICDA	4.45578	2.51147	14.5652	0.0372657	-40.4937
HT	RHOH	4.45449	4.83254	59.2596	0.008387	-37.6022
HT	IL12RB1	4.41371	2.48343	192.804	0.00239062	-35.1675
HT	ICOS	4.39681	2.47216	21.8668	0.0242093	-39.6579
HT	SH2D1A	4.32999	4.01257	14.55	0.0373071	-40.4959
HT	SHCBP1	4.31604	2.41832	12.8191	0.0426669	-40.7558
HT	CDKN3	4.28992	2.4009	23.1915	0.0227428	-39.5368
HT	SYNE3	-4.27359	0.965484	-6.48385e+16	8.36274e-19	33.8658
HT	FAM168A	4.26322	2.3831	17.3427	0.0309662	-40.135
HT	AL133482.1	4.25865	2.38006	15.0342	0.0360342	-40.4286
HT	AURKB	4.25781	2.37949	17.8226	0.030082	-40.0789
HT	IL6R	4.25781	2.37949	17.8226	0.030082	-40.0789
HT	TPX2	4.25781	2.37949	17.8226	0.030082	-40.0789
HT	LTF	4.17014	6.23979	16.5177	0.0326103	-40.2352
HT	CALCB	-4.11553	0.912799	-6.24405e+16	8.70488e-19	33.7884
HT	ITLN1	-4.11553	0.912799	-6.24405e+16	8.70488e-19	33.7884
HT	CENPK	4.07133	2.25517	11.7854	0.04664	-40.9281
HT	KIFC1	4.0696	2.25402	11.8806	0.0462444	-40.9116
HT	IGHG4	4.02016	5.62259	13.7377	0.0396498	-40.6138
HT	ZC3H12D	3.97778	2.19281	21.1172	0.0251233	-39.7298
HT	HLA-DOB	3.96088	4.50347	12.3838	0.0442573	-40.8266
HT	BTNL8	-3.91874	0.847201	-5.94548e+16	9.17072e-19	33.6877
HT	DLGAP5	3.8656	2.11802	7331084613654180	8.50321e-18	29.3715
HT	NCF1	3.8656	2.11802	7331084613654180	8.50321e-18	29.3715
HT	USP13	-3.84742	0.823427	-5.83727e+16	9.35171e-19	33.6499
HT	CCNA2	3.75892	2.0469	20.9837	0.0252931	-39.7428
HT	CCR4	3.75892	2.0469	20.9837	0.0252931	-39.7428
HT	CDC6	3.75892	2.0469	20.9837	0.0252931	-39.7428
HT	CLEC17A	3.75892	2.0469	20.9837	0.0252931	-39.7428
HT	PILRA	3.75892	2.0469	20.9837	0.0252931	-39.7428
HT	TMC8	3.75892	2.0469	20.9837	0.0252931	-39.7428
HT	TULP4	3.75892	2.0469	20.9837	0.0252931	-39.7428
HT	SPP1	3.72974	5.94619	29.595	0.0175508	-39.0343
HT	CCNB2	3.68211	3.58066	40.5922	0.0125424	-38.3828
HT	GATAD2A	-3.67152	0.764793	-5.57039e+16	9.82914e-19	33.5537
HT	LRRC46	-3.67152	0.764793	-5.57039e+16	9.82914e-19	33.5537
HT	RDH12	-3.67152	0.764793	-5.57039e+16	9.82914e-19	33.5537
HT	RFX1	-3.67152	0.764793	-5.57039e+16	9.82914e-19	33.5537
HT	BTLA	3.65224	1.97578	3463222345275070	1.88846e-17	27.8237
HT	SCD	3.65224	1.97578	3463222345275070	1.88846e-17	27.8237
HT	LCP1	3.64833	6.97436	53.0218	0.00944037	-37.8317
HT	ZBTB16	-3.62828	5.95928	-38.9996	0.0130878	-38.4653
HT	TBCD	-3.62179	0.748216	-5.49494e+16	9.9728e-19	33.5256
HT	DES	-3.60954	0.744135	-5.47636e+16	1.00088e-18	33.5186
HT	CD40LG	3.52688	1.89221	16.7556	0.0321191	-40.2058
HT	CENPF	3.50899	1.88028	14.5881	0.0372038	-40.4905
HT	CIP2A	3.50899	1.88028	14.5881	0.0372038	-40.4905
HT	MARCHF2	3.50899	1.88028	14.5881	0.0372038	-40.4905
HT	ZNF215	3.50899	1.88028	14.5881	0.0372038	-40.4905
HT	GIMAP5	3.5073	1.87916	40.9501	0.0124259	-38.3647
HT	LIMD2	3.44906	5.01025	168.228	0.00276386	-35.4489
HT	CCR7	3.43981	4.15609	85.2956	0.00569302	-36.8507
HT	CCDC144NL-AS1	-3.40153	0.674797	-5.16077e+16	1.06613e-18	33.3965
HT	DLX5	-3.40153	0.674797	-5.16077e+16	1.06613e-18	33.3965
HT	DMRT1	-3.40153	0.674797	-5.16077e+16	1.06613e-18	33.3965
HT	FAM66D	-3.40153	0.674797	-5.16077e+16	1.06613e-18	33.3965
HT	SIRPA	-3.40153	0.674797	-5.16077e+16	1.06613e-18	33.3965
HT	SUSD5	-3.40153	0.674797	-5.16077e+16	1.06613e-18	33.3965
HT	SYT13	-3.40153	0.674797	-5.16077e+16	1.06613e-18	33.3965
HT	TOR2A	-3.40153	0.674797	-5.16077e+16	1.06613e-18	33.3965
HT	SULT1A4	-3.39506	0.67264	-5.15095e+16	1.06829e-18	33.3926
HT	IGHG1	3.39342	9.66002	12.348	0.0443931	-40.8326
HT	ATF5	3.38364	1.79671	112.606	0.00423643	-36.2774
HT	BACH2	3.38364	1.79671	112.606	0.00423643	-36.2774
HT	LINC02397	3.38364	1.79671	112.606	0.00423643	-36.2774
HT	LZTS3	3.38364	1.79671	112.606	0.00423643	-36.2774
HT	AOAH	3.35209	3.36064	30.5456	0.0169707	-38.9692
HT	CD300A	3.29019	3.31937	568.176	0.000757034	-32.9369
HT	KIF11	3.27947	1.72727	16.0006	0.0337295	-40.3006
HT	ALPK2	3.23158	1.69534	14.3444	0.0378743	-40.5251
HT	BFSP1	3.23158	1.69534	14.3444	0.0378743	-40.5251
HT	BOLA2	3.23158	1.69534	14.3444	0.0378743	-40.5251
HT	CKAP2L	3.23158	1.69534	14.3444	0.0378743	-40.5251
HT	HECA	3.23158	1.69534	14.3444	0.0378743	-40.5251
HT	LYPD3	3.23158	1.69534	14.3444	0.0378743	-40.5251
HT	SLC30A2	3.23158	1.69534	14.3444	0.0378743	-40.5251
HT	LGALS9	3.22728	4.8624	13.7841	0.0395084	-40.6069
HT	ARL17B	3.22151	4.49598	63.4279	0.00780192	-37.4619
HT	AC004803.1	-3.16993	0.597595	-4.80938e+16	1.1492e-18	33.2514
HT	AC087477.2	-3.16993	0.597595	-4.80938e+16	1.1492e-18	33.2514
HT	CARMN	-3.16993	0.597595	-4.80938e+16	1.1492e-18	33.2514
HT	FAM110B	-3.16993	0.597595	-4.80938e+16	1.1492e-18	33.2514
HT	LINC01270	-3.16993	0.597595	-4.80938e+16	1.1492e-18	33.2514
HT	LINC02308	-3.16993	0.597595	-4.80938e+16	1.1492e-18	33.2514
HT	LRRC8A	-3.16993	0.597595	-4.80938e+16	1.1492e-18	33.2514
HT	NIPBL-DT	-3.16993	0.597595	-4.80938e+16	1.1492e-18	33.2514
HT	PLS3-AS1	-3.16993	0.597595	-4.80938e+16	1.1492e-18	33.2514
HT	PPP1R26-AS1	-3.16993	0.597595	-4.80938e+16	1.1492e-18	33.2514
HT	TAF13	-3.16993	0.597595	-4.80938e+16	1.1492e-18	33.2514
HT	TTN-AS1	-3.16993	0.597595	-4.80938e+16	1.1492e-18	33.2514
HT	CD247	3.16987	3.23916	16.1527	0.0333927	-40.2812
HT	IGFLR1	3.16987	3.23916	16.1527	0.0333927	-40.2812
HT	NPL	3.14193	1.63557	50.4177	0.00995987	-37.9356
HT	AC109583.1	-3.08268	0.568513	-4.67701e+16	1.18383e-18	33.1939
HT	HLA-DOA	3.08218	4.4031	12.0909	0.0453934	-40.8757
HT	ZNF641	-3.06436	0.562408	-4.64922e+16	1.19136e-18	33.1816
HT	AC022414.1	-3.05508	0.559315	-4.63514e+16	1.19521e-18	33.1754
HT	ARHGEF39	3.04857	1.57333	37.169	0.0137744	-38.5645
HT	HJURP	3.04857	1.57333	37.169	0.0137744	-38.5645
HT	KCTD5	3.04857	1.57333	37.169	0.0137744	-38.5645
HT	LINC00892	3.04857	1.57333	37.169	0.0137744	-38.5645
HT	MACROD2	3.04857	1.57333	37.169	0.0137744	-38.5645
HT	TDO2	3.04857	1.57333	37.169	0.0137744	-38.5645
HT	TNF	3.04857	1.57333	37.169	0.0137744	-38.5645
HT	TSPYL4	3.04857	1.57333	37.169	0.0137744	-38.5645
HT	DIS3L2	-3.04534	0.556068	-4.62036e+16	1.19928e-18	33.1688
HT	EPHB2	-3.04046	0.554441	-4.61296e+16	1.20133e-18	33.1655
HT	PPT2	-3.03945	0.554102	-4.61142e+16	1.20176e-18	33.1648
HT	PARP2	-3.03557	2.87474	-1.84433e+19	2.048e-21	39.4174
HT	SYNC	-3.02826	0.550373	-4.59444e+16	1.20648e-18	33.1572
HT	AL136295.17	-3.02638	0.549746	-4.59159e+16	1.20728e-18	33.1559
HT	FHL5	-3.02621	0.549691	-4.59134e+16	1.20735e-18	33.1558
HT	KIF16B	3.01234	1.54918	15.5545	0.0347568	-40.3587
HT	MAP4K1	2.99229	3.12078	29.3557	0.017703	-39.0511
HT	TRAF3IP3	2.97804	4.33367	12.7816	0.0427996	-40.7618
HT	CTLA4	2.93406	3.08195	14.6908	0.0369279	-40.4761
HT	CLEC2D	2.93347	4.30396	27.2124	0.0191887	-39.2073
HT	DNM2	2.92586	1.49153	23.5918	0.0223329	-39.5015
HT	ITGAL	2.89856	3.05829	30.7951	0.0168246	-38.9524
HT	FAM91A1	2.88699	3.05057	38.5466	0.0132515	-38.4894
HT	PCDH18	2.88353	1.46331	22.3255	0.0236812	-39.6152
HT	CD38	2.87454	4.62724	35.7659	0.0143497	-38.6438
HT	AC002467.1	2.86653	1.45197	12.8166	0.0426758	-40.7562
HT	CD70	2.86653	1.45197	12.8166	0.0426758	-40.7562
HT	DHX37	2.86653	1.45197	12.8166	0.0426758	-40.7562
HT	EZH2	2.86653	1.45197	12.8166	0.0426758	-40.7562
HT	IL22RA1	2.86653	1.45197	12.8166	0.0426758	-40.7562
HT	MMP7	2.86653	1.45197	12.8166	0.0426758	-40.7562
HT	PRF1	2.86653	1.45197	12.8166	0.0426758	-40.7562
HT	RHOU	2.86653	1.45197	12.8166	0.0426758	-40.7562
HT	TUBB3	2.86653	1.45197	12.8166	0.0426758	-40.7562
HT	VAV1	2.86653	1.45197	12.8166	0.0426758	-40.7562
HT	VWA1	2.86653	1.45197	12.8166	0.0426758	-40.7562
HT	FCGR3A	2.83568	1.43141	17.5473	0.0305831	-40.1109
HT	LINC02432	-2.83097	2.06957	-1.07378e+16	5.66538e-18	30.1592
HT	SLAMF7	2.82994	5.70117	26.5571	0.0196925	-39.2576
HT	AEBP1	2.82875	3.01175	123.568	0.00383774	-36.0857
HT	VCAM1	2.82061	4.82289	22.98	0.0229652	-39.5557
HT	FPR3	2.81185	3.00048	13.9843	0.0389091	-40.5773
HT	AC001226.2	-2.80735	0.476739	-4.25929e+16	1.30774e-18	33.0012
HT	AC092835.1	-2.80735	0.476739	-4.25929e+16	1.30774e-18	33.0012
HT	AC108860.2	-2.80735	0.476739	-4.25929e+16	1.30774e-18	33.0012
HT	ADCY2	-2.80735	0.476739	-4.25929e+16	1.30774e-18	33.0012
HT	ADGRB2	-2.80735	0.476739	-4.25929e+16	1.30774e-18	33.0012
HT	AF111167.2	-2.80735	0.476739	-4.25929e+16	1.30774e-18	33.0012
HT	AL359643.3	-2.80735	0.476739	-4.25929e+16	1.30774e-18	33.0012
HT	ANKRD18A	-2.80735	0.476739	-4.25929e+16	1.30774e-18	33.0012
HT	AP000704.2	-2.80735	0.476739	-4.25929e+16	1.30774e-18	33.0012
HT	CATSPER2P1	-2.80735	0.476739	-4.25929e+16	1.30774e-18	33.0012
HT	CBFA2T3	-2.80735	0.476739	-4.25929e+16	1.30774e-18	33.0012
HT	CLSTN2	-2.80735	0.476739	-4.25929e+16	1.30774e-18	33.0012
HT	CRYBB3	-2.80735	0.476739	-4.25929e+16	1.30774e-18	33.0012
HT	DIPK1B	-2.80735	0.476739	-4.25929e+16	1.30774e-18	33.0012
HT	EVC	-2.80735	0.476739	-4.25929e+16	1.30774e-18	33.0012
HT	GRP	-2.80735	0.476739	-4.25929e+16	1.30774e-18	33.0012
HT	IKZF2	-2.80735	0.476739	-4.25929e+16	1.30774e-18	33.0012
HT	KIAA1549	-2.80735	0.476739	-4.25929e+16	1.30774e-18	33.0012
HT	KIF19	-2.80735	0.476739	-4.25929e+16	1.30774e-18	33.0012
HT	KLRC1	-2.80735	0.476739	-4.25929e+16	1.30774e-18	33.0012
HT	LINC00894	-2.80735	0.476739	-4.25929e+16	1.30774e-18	33.0012
HT	LINC02515	-2.80735	0.476739	-4.25929e+16	1.30774e-18	33.0012
HT	LRRC37A6P	-2.80735	0.476739	-4.25929e+16	1.30774e-18	33.0012
HT	MT1L	-2.80735	0.476739	-4.25929e+16	1.30774e-18	33.0012
HT	NKILA	-2.80735	0.476739	-4.25929e+16	1.30774e-18	33.0012
HT	NUDT10	-2.80735	0.476739	-4.25929e+16	1.30774e-18	33.0012
HT	PAH	-2.80735	0.476739	-4.25929e+16	1.30774e-18	33.0012
HT	PCSK6	-2.80735	0.476739	-4.25929e+16	1.30774e-18	33.0012
HT	PKD1L2	-2.80735	0.476739	-4.25929e+16	1.30774e-18	33.0012
HT	PMP2	-2.80735	0.476739	-4.25929e+16	1.30774e-18	33.0012
HT	PRELID3A	-2.80735	0.476739	-4.25929e+16	1.30774e-18	33.0012
HT	PTPRU	-2.80735	0.476739	-4.25929e+16	1.30774e-18	33.0012
HT	SEPTIN5	-2.80735	0.476739	-4.25929e+16	1.30774e-18	33.0012
HT	TENT5B	-2.80735	0.476739	-4.25929e+16	1.30774e-18	33.0012
HT	TMEM44	-2.80735	0.476739	-4.25929e+16	1.30774e-18	33.0012
HT	ZC3HAV1L	-2.80735	0.476739	-4.25929e+16	1.30774e-18	33.0012
HT	ZNF257	-2.80735	0.476739	-4.25929e+16	1.30774e-18	33.0012
HT	ZNF625	-2.80735	0.476739	-4.25929e+16	1.30774e-18	33.0012
HT	ZNF728	-2.80735	0.476739	-4.25929e+16	1.30774e-18	33.0012
HT	BID	2.76951	1.3873	27.8937	0.0186909	-39.1564
HT	KIF2C	2.76551	2.96959	21.423	0.0247425	-39.7002
HT	TRIM73	2.76174	1.38211	35.859	0.0143101	-38.6385
HT	PAM	2.73322	1.3631	15276.6	2.28091e-05	-26.143
HT	AC243964.4	-2.70903	0.443964	-4.11011e+16	1.3583e-18	32.9278
HT	MET	-2.70165	0.441504	-4.09892e+16	1.36225e-18	32.9222
HT	SLC27A6	2.69412	3.65896	11.6733	0.0471143	-40.9477
HT	TCF20	-2.68924	0.437368	-4.08009e+16	1.36893e-18	32.9127
HT	ZNF543	-2.68863	2.02213	-1.01979e+16	5.98505e-18	30.0527
HT	DGKI	-2.66809	0.430317	-4.048e+16	1.38048e-18	32.8964
HT	AC022400.3	-2.65918	0.427346	-4.03447e+16	1.38541e-18	32.8895
HT	EBF3	-2.65481	0.425891	-4.02785e+16	1.38783e-18	32.8861
HT	SKAP1	2.65376	3.63205	16.2778	0.0331205	-40.2653
HT	THBS2	-2.64058	0.421147	-4.00626e+16	1.39579e-18	32.8751
HT	ZNF623	-2.64016	0.421007	-4.00562e+16	1.39603e-18	32.8747
HT	GPHN	-2.63678	0.419879	-4.00049e+16	1.39793e-18	32.8721
HT	AC118553.2	-2.62104	0.414634	-3.97662e+16	1.40687e-18	32.8598
HT	CD83	2.62009	5.82141	22.2192	0.0238017	-39.625
HT	GGT3P	-2.61376	0.412207	-3.96557e+16	1.41103e-18	32.854
HT	KLHL6	2.60156	3.59726	34.5103	0.0149056	-38.7175
HT	LAX1	2.59855	2.85828	16.5419	0.0325597	-40.2322
HT	GPR65	2.55322	3.56503	440.911	0.000991502	-33.4603
HT	AC093827.4	-2.53057	1.96944	-9598422479285250	6.38357e-18	29.9277
HT	INPP5F	-2.53057	1.96944	-9598422479285250	6.38357e-18	29.9277
HT	SP140	2.40809	3.9537	13.5743	0.0401559	-40.6384
HT	SLC7A7	2.4057	3.46668	64.441	0.00767151	-37.4292
HT	ZBP1	2.4056	2.72965	11.464	0.0480249	-40.9847
HT	CD27	2.36916	1.12039	17.8791	0.0299809	-40.0723
HT	SIK3	2.36378	1.11681	33.6341	0.0153188	-38.7706
HT	LAPTM5	2.35176	7.15794	18.397	0.0290857	-40.0136
HT	CD52	2.33556	3.90535	19.8311	0.0268573	-39.8591
HT	EVI2A	2.33547	1.09793	102.719	0.00467155	-36.4671
HT	FABP3	-2.33378	1.90384	-8851992252883720	6.9578e-18	29.7606
HT	MIR4453HG	-2.33378	1.90384	-8851992252883720	6.9578e-18	29.7606
HT	MRPS30-DT	-2.33378	1.90384	-8851992252883720	6.9578e-18	29.7606
HT	TLCD4	-2.33378	1.90384	-8851992252883720	6.9578e-18	29.7606
HT	CACNA1C	2.32199	1.08894	23967.3	1.41254e-05	-25.2134
HT	AC004687.1	2.32193	1.08891	1.41074e+19	2.72376e-21	39.4154
HT	AC005562.1	-2.32193	0.31493	-3.52281e+16	1.60046e-18	32.61
HT	AC011462.5	2.32193	1.08891	1.41074e+19	2.72376e-21	39.4154
HT	AC012236.1	2.32193	1.08891	1.41074e+19	2.72376e-21	39.4154
HT	AC012358.1	-2.32193	0.31493	-3.52281e+16	1.60046e-18	32.61
HT	AC016705.2	2.32193	1.08891	1.41074e+19	2.72376e-21	39.4154
HT	AC016745.2	-2.32193	0.31493	-3.52281e+16	1.60046e-18	32.61
HT	AC073389.1	-2.32193	0.31493	-3.52281e+16	1.60046e-18	32.61
HT	AC078846.1	-2.32193	0.31493	-3.52281e+16	1.60046e-18	32.61
HT	AC079305.4	-2.32193	0.31493	-3.52281e+16	1.60046e-18	32.61
HT	AC079949.2	-2.32193	0.31493	-3.52281e+16	1.60046e-18	32.61
HT	AC090409.1	-2.32193	0.31493	-3.52281e+16	1.60046e-18	32.61
HT	AC091729.3	2.32193	1.08891	1.41074e+19	2.72376e-21	39.4154
HT	AC092053.5	-2.32193	0.31493	-3.52281e+16	1.60046e-18	32.61
HT	AC092718.3	-2.32193	0.31493	-3.52281e+16	1.60046e-18	32.61
HT	AC096642.1	-2.32193	0.31493	-3.52281e+16	1.60046e-18	32.61
HT	AC104964.3	-2.32193	0.31493	-3.52281e+16	1.60046e-18	32.61
HT	AC108010.1	-2.32193	0.31493	-3.52281e+16	1.60046e-18	32.61
HT	AC127526.4	-2.32193	0.31493	-3.52281e+16	1.60046e-18	32.61
HT	AC142472.1	-2.32193	0.31493	-3.52281e+16	1.60046e-18	32.61
HT	AC244453.2	-2.32193	0.31493	-3.52281e+16	1.60046e-18	32.61
HT	ACTR3B	-2.32193	0.31493	-3.52281e+16	1.60046e-18	32.61
HT	ACVR2B-AS1	-2.32193	0.31493	-3.52281e+16	1.60046e-18	32.61
HT	ADAMTSL2	-2.32193	0.31493	-3.52281e+16	1.60046e-18	32.61
HT	ADORA1	-2.32193	0.31493	-3.52281e+16	1.60046e-18	32.61
HT	ADPRHL1	-2.32193	0.31493	-3.52281e+16	1.60046e-18	32.61
HT	AL035425.2	-2.32193	0.31493	-3.52281e+16	1.60046e-18	32.61
HT	AL133216.2	-2.32193	0.31493	-3.52281e+16	1.60046e-18	32.61
HT	AL357033.4	-2.32193	0.31493	-3.52281e+16	1.60046e-18	32.61
HT	AL590822.3	-2.32193	0.31493	-3.52281e+16	1.60046e-18	32.61
HT	AMDHD1	-2.32193	0.31493	-3.52281e+16	1.60046e-18	32.61
HT	AP002748.4	-2.32193	0.31493	-3.52281e+16	1.60046e-18	32.61
HT	APLNR	2.32193	1.08891	1.41074e+19	2.72376e-21	39.4154
HT	ARMC4	-2.32193	0.31493	-3.52281e+16	1.60046e-18	32.61
HT	ASB2	2.32193	1.08891	1.41074e+19	2.72376e-21	39.4154
HT	AVIL	2.32193	1.08891	1.41074e+19	2.72376e-21	39.4154
HT	B3GNT2	-2.32193	0.31493	-3.52281e+16	1.60046e-18	32.61
HT	BLACAT1	2.32193	1.08891	1.41074e+19	2.72376e-21	39.4154
HT	BVES-AS1	-2.32193	0.31493	-3.52281e+16	1.60046e-18	32.61
HT	BX664727.3	-2.32193	0.31493	-3.52281e+16	1.60046e-18	32.61
HT	C9orf40	-2.32193	0.31493	-3.52281e+16	1.60046e-18	32.61
HT	CA3	-2.32193	0.31493	-3.52281e+16	1.60046e-18	32.61
HT	CAPN5	-2.32193	0.31493	-3.52281e+16	1.60046e-18	32.61
HT	CARM1	-2.32193	0.31493	-3.52281e+16	1.60046e-18	32.61
HT	CASC9	-2.32193	0.31493	-3.52281e+16	1.60046e-18	32.61
HT	CCN4	2.32193	1.08891	1.41074e+19	2.72376e-21	39.4154
HT	CD209	2.32193	1.08891	1.41074e+19	2.72376e-21	39.4154
HT	CD2BP2-DT	-2.32193	0.31493	-3.52281e+16	1.60046e-18	32.61
HT	CD300LF	2.32193	1.08891	1.41074e+19	2.72376e-21	39.4154
HT	CDH4	-2.32193	0.31493	-3.52281e+16	1.60046e-18	32.61
HT	CDHR1	2.32193	1.08891	1.41074e+19	2.72376e-21	39.4154
HT	CDHR3	-2.32193	0.31493	-3.52281e+16	1.60046e-18	32.61
HT	CFAP44	2.32193	1.08891	1.41074e+19	2.72376e-21	39.4154
HT	COL5A3	-2.32193	0.31493	-3.52281e+16	1.60046e-18	32.61
HT	CU638689.5	-2.32193	0.31493	-3.52281e+16	1.60046e-18	32.61
HT	CYP8B1	-2.32193	0.31493	-3.52281e+16	1.60046e-18	32.61
HT	DENND2A	2.32193	1.08891	1.41074e+19	2.72376e-21	39.4154
HT	DZIP1	-2.32193	0.31493	-3.52281e+16	1.60046e-18	32.61
HT	EFCAB13	2.32193	1.08891	1.41074e+19	2.72376e-21	39.4154
HT	EVPL	2.32193	1.08891	1.41074e+19	2.72376e-21	39.4154
HT	FAM153A	-2.32193	0.31493	-3.52281e+16	1.60046e-18	32.61
HT	FAM182B	-2.32193	0.31493	-3.52281e+16	1.60046e-18	32.61
HT	FAM225B	-2.32193	0.31493	-3.52281e+16	1.60046e-18	32.61
HT	FAM66B	-2.32193	0.31493	-3.52281e+16	1.60046e-18	32.61
HT	FAXC	2.32193	1.08891	1.41074e+19	2.72376e-21	39.4154
HT	FCRL6	2.32193	1.08891	1.41074e+19	2.72376e-21	39.4154
HT	FHL3	-2.32193	0.31493	-3.52281e+16	1.60046e-18	32.61
HT	FLG-AS1	-2.32193	0.31493	-3.52281e+16	1.60046e-18	32.61
HT	FLT3	2.32193	1.08891	1.41074e+19	2.72376e-21	39.4154
HT	GATA2-AS1	-2.32193	0.31493	-3.52281e+16	1.60046e-18	32.61
HT	GRB14	2.32193	1.08891	1.41074e+19	2.72376e-21	39.4154
HT	GRIK5	-2.32193	0.31493	-3.52281e+16	1.60046e-18	32.61
HT	GRTP1	2.32193	1.08891	1.41074e+19	2.72376e-21	39.4154
HT	HAND2	-2.32193	0.31493	-3.52281e+16	1.60046e-18	32.61
HT	HAND2-AS1	-2.32193	0.31493	-3.52281e+16	1.60046e-18	32.61
HT	HFE	-2.32193	0.31493	-3.52281e+16	1.60046e-18	32.61
HT	HRK	-2.32193	0.31493	-3.52281e+16	1.60046e-18	32.61
HT	HSPA6	2.32193	1.08891	1.41074e+19	2.72376e-21	39.4154
HT	ICAM4	-2.32193	0.31493	-3.52281e+16	1.60046e-18	32.61
HT	IGLV2-23	2.32193	1.08891	1.41074e+19	2.72376e-21	39.4154
HT	IGSF9	2.32193	1.08891	1.41074e+19	2.72376e-21	39.4154
HT	IL21	2.32193	1.08891	1.41074e+19	2.72376e-21	39.4154
HT	JPH1	-2.32193	0.31493	-3.52281e+16	1.60046e-18	32.61
HT	KIAA0408	-2.32193	0.31493	-3.52281e+16	1.60046e-18	32.61
HT	KIAA1671-AS1	-2.32193	0.31493	-3.52281e+16	1.60046e-18	32.61
HT	KLK10	-2.32193	0.31493	-3.52281e+16	1.60046e-18	32.61
HT	KLRG2	-2.32193	0.31493	-3.52281e+16	1.60046e-18	32.61
HT	KRT80	-2.32193	0.31493	-3.52281e+16	1.60046e-18	32.61
HT	LINC00402	2.32193	1.08891	1.41074e+19	2.72376e-21	39.4154
HT	LINC00957	-2.32193	0.31493	-3.52281e+16	1.60046e-18	32.61
HT	LINC01229	-2.32193	0.31493	-3.52281e+16	1.60046e-18	32.61
HT	LINC02197	-2.32193	0.31493	-3.52281e+16	1.60046e-18	32.61
HT	LINC02595	-2.32193	0.31493	-3.52281e+16	1.60046e-18	32.61
HT	LINC02814	-2.32193	0.31493	-3.52281e+16	1.60046e-18	32.61
HT	LY6K	-2.32193	0.31493	-3.52281e+16	1.60046e-18	32.61
HT	MAPK8IP2	-2.32193	0.31493	-3.52281e+16	1.60046e-18	32.61
HT	MLLT1	-2.32193	0.31493	-3.52281e+16	1.60046e-18	32.61
HT	MMP24	-2.32193	0.31493	-3.52281e+16	1.60046e-18	32.61
HT	MOSMO	-2.32193	0.31493	-3.52281e+16	1.60046e-18	32.61
HT	MTUS2	-2.32193	0.31493	-3.52281e+16	1.60046e-18	32.61
HT	MYOCOS	-2.32193	0.31493	-3.52281e+16	1.60046e-18	32.61
HT	NAXD	-2.32193	0.31493	-3.52281e+16	1.60046e-18	32.61
HT	NMRAL2P	-2.32193	0.31493	-3.52281e+16	1.60046e-18	32.61
HT	NPIPA5	-2.32193	0.31493	-3.52281e+16	1.60046e-18	32.61
HT	NR5A2	-2.32193	0.31493	-3.52281e+16	1.60046e-18	32.61
HT	NSG1	-2.32193	0.31493	-3.52281e+16	1.60046e-18	32.61
HT	NWD2	-2.32193	0.31493	-3.52281e+16	1.60046e-18	32.61
HT	P3H3	2.32193	1.08891	1.41074e+19	2.72376e-21	39.4154
HT	PAOX	-2.32193	0.31493	-3.52281e+16	1.60046e-18	32.61
HT	PART1	2.32193	1.08891	1.41074e+19	2.72376e-21	39.4154
HT	PCDHB4	-2.32193	0.31493	-3.52281e+16	1.60046e-18	32.61
HT	PCDHGA6	-2.32193	0.31493	-3.52281e+16	1.60046e-18	32.61
HT	PCSK1	-2.32193	0.31493	-3.52281e+16	1.60046e-18	32.61
HT	PDZRN3	-2.32193	0.31493	-3.52281e+16	1.60046e-18	32.61
HT	PDZRN4	-2.32193	0.31493	-3.52281e+16	1.60046e-18	32.61
HT	PIPOX	2.32193	1.08891	1.41074e+19	2.72376e-21	39.4154
HT	PLA2G4F	-2.32193	0.31493	-3.52281e+16	1.60046e-18	32.61
HT	PLD5	-2.32193	0.31493	-3.52281e+16	1.60046e-18	32.61
HT	POMGNT2	-2.32193	0.31493	-3.52281e+16	1.60046e-18	32.61
HT	PRR14	-2.32193	0.31493	-3.52281e+16	1.60046e-18	32.61
HT	PRR15	-2.32193	0.31493	-3.52281e+16	1.60046e-18	32.61
HT	PSTPIP1	2.32193	1.08891	1.41074e+19	2.72376e-21	39.4154
HT	RAMP2-AS1	2.32193	1.08891	1.41074e+19	2.72376e-21	39.4154
HT	RELA-DT	-2.32193	0.31493	-3.52281e+16	1.60046e-18	32.61
HT	RLN1	-2.32193	0.31493	-3.52281e+16	1.60046e-18	32.61
HT	RTN1	2.32193	1.08891	1.41074e+19	2.72376e-21	39.4154
HT	SAMD1	2.32193	1.08891	1.41074e+19	2.72376e-21	39.4154
HT	SCGN	-2.32193	0.31493	-3.52281e+16	1.60046e-18	32.61
HT	SCN3A	2.32193	1.08891	1.41074e+19	2.72376e-21	39.4154
HT	SDK2	-2.32193	0.31493	-3.52281e+16	1.60046e-18	32.61
HT	SHISA9	-2.32193	0.31493	-3.52281e+16	1.60046e-18	32.61
HT	SLC22A15	2.32193	1.08891	1.41074e+19	2.72376e-21	39.4154
HT	SLC26A10	-2.32193	0.31493	-3.52281e+16	1.60046e-18	32.61
HT	SLC52A3	-2.32193	0.31493	-3.52281e+16	1.60046e-18	32.61
HT	SNAP91	-2.32193	0.31493	-3.52281e+16	1.60046e-18	32.61
HT	SOD3	-2.32193	0.31493	-3.52281e+16	1.60046e-18	32.61
HT	SPATA2L	-2.32193	0.31493	-3.52281e+16	1.60046e-18	32.61
HT	SPINK5	-2.32193	0.31493	-3.52281e+16	1.60046e-18	32.61
HT	ST3GAL6-AS1	2.32193	1.08891	1.41074e+19	2.72376e-21	39.4154
HT	STK32B	2.32193	1.08891	1.41074e+19	2.72376e-21	39.4154
HT	SUSD4	2.32193	1.08891	1.41074e+19	2.72376e-21	39.4154
HT	TMEFF1	-2.32193	0.31493	-3.52281e+16	1.60046e-18	32.61
HT	TMEM236	-2.32193	0.31493	-3.52281e+16	1.60046e-18	32.61
HT	TNFRSF18	2.32193	1.08891	1.41074e+19	2.72376e-21	39.4154
HT	TRIM7	-2.32193	0.31493	-3.52281e+16	1.60046e-18	32.61
HT	TTYH3	2.32193	1.08891	1.41074e+19	2.72376e-21	39.4154
HT	U62317.4	2.32193	1.08891	1.41074e+19	2.72376e-21	39.4154
HT	WNT11	2.32193	1.08891	1.41074e+19	2.72376e-21	39.4154
HT	Z82217.1	-2.32193	0.31493	-3.52281e+16	1.60046e-18	32.61
HT	ZC3H12B	2.32193	1.08891	1.41074e+19	2.72376e-21	39.4154
HT	ZNF341	2.32193	1.08891	1.41074e+19	2.72376e-21	39.4154
HT	ZNF530	-2.32193	0.31493	-3.52281e+16	1.60046e-18	32.61
HT	ZNF713	-2.32193	0.31493	-3.52281e+16	1.60046e-18	32.61
HT	ZNF812P	-2.32193	0.31493	-3.52281e+16	1.60046e-18	32.61
HT	PLEKHO1	2.31128	3.40373	11.7994	0.0465812	-40.9257
HT	EVI5	2.29632	1.07183	28.6627	0.0181583	-39.1003
HT	EVI2B	2.28266	5.47867	41.1296	0.0123682	-38.3556
HT	RNF43	2.28234	1.06251	34.3296	0.014989	-38.7284
HT	SELL	2.2812	5.69971	40.1082	0.0127035	-38.4075
HT	JAK3	2.27315	1.05639	27.7556	0.0187898	-39.1666
HT	TFEB	2.27315	1.05639	27.7556	0.0187898	-39.1666
HT	PRAL	2.26251	3.13428	23.4375	0.0224892	-39.5151
HT	CD3E	2.23291	5.88447	22.1926	0.0238319	-39.6275
HT	SMG1P3	2.22745	1.02592	14.0407	0.0387432	-40.569
HT	MICOS13	-2.20898	0.277279	-3.35144e+16	1.68767e-18	32.5072
HT	ZSCAN20	-2.1871	0.269987	-3.31824e+16	1.70564e-18	32.4867
HT	TRPS1	-2.17489	0.265917	-3.29972e+16	1.71583e-18	32.4752
HT	C15orf39	2.17396	2.57522	12.1358	0.0452153	-40.8681
HT	CD5	2.17396	2.57522	12.1358	0.0452153	-40.8681
HT	CPNE5	2.17396	2.57522	12.1358	0.0452153	-40.8681
HT	RAB11FIP4	2.17396	2.57522	12.1358	0.0452153	-40.8681
HT	TLR7	2.17396	2.57522	12.1358	0.0452153	-40.8681
HT	AL358113.1	-2.17129	0.264717	-3.29426e+16	1.71886e-18	32.4718
HT	BACE1	-2.16928	0.264046	-3.2912e+16	1.72055e-18	32.4699
HT	LAT	2.16044	4.89999	99.0183	0.00485752	-36.5428
HT	HCLS1	2.15742	6.43493	39.4551	0.0129272	-38.4414
HT	PSMB10	2.14946	6.53239	11.433	0.0481626	-40.9903
HT	OASL	2.11614	3.75907	28.071	0.0185655	-39.1433
HT	MBNL3	-2.09888	0.240581	-3.1844e+16	1.78201e-18	32.4019
HT	PRKD3	-2.09408	0.238981	-3.17712e+16	1.78636e-18	32.3971
HT	AC139769.1	-2.09401	2.56088	-1.27226e+19	3.04026e-21	39.4144
HT	LONRF1	-2.09401	2.56088	-1.27226e+19	3.04026e-21	39.4144
HT	ARMCX5-GPRASP2	-2.08656	1.82143	-7914277488087240	7.83814e-18	29.5295
HT	ARSB	-2.08656	1.82143	-7914277488087240	7.83814e-18	29.5295
HT	B3GALT2	-2.08656	1.82143	-7914277488087240	7.83814e-18	29.5295
HT	DPH6-DT	-2.08656	1.82143	-7914277488087240	7.83814e-18	29.5295
HT	LDHC	-2.08656	1.82143	-7914277488087240	7.83814e-18	29.5295
HT	SPATA5L1	-2.08656	1.82143	-7914277488087240	7.83814e-18	29.5295
HT	TLDC2	-2.08656	1.82143	-7914277488087240	7.83814e-18	29.5295
HT	MGAT2	-2.08163	0.234832	-3.15823e+16	1.79773e-18	32.3848
HT	PCDHA3	-2.07895	0.233938	-3.15417e+16	1.8002e-18	32.3822
HT	DUSP19	2.06728	2.5041	1960287048815280	3.46006e-17	26.6491
HT	MKI67	2.06728	2.5041	1960287048815280	3.46006e-17	26.6491
HT	SLA2	2.06728	2.5041	1960287048815280	3.46006e-17	26.6491
HT	DGKA	2.06081	4.08475	15.8885	0.0339822	-40.3151
HT	FAM120B	-2.05758	0.226814	-3.12174e+16	1.8201e-18	32.3609
HT	SNX22	-2.05274	6.47884	-29.3918	0.0176799	-39.0485
HT	MAN2A1	-2.04821	0.223691	-3.10753e+16	1.82896e-18	32.3515
HT	AC012651.1	-2.04709	0.223318	-3.10583e+16	1.83002e-18	32.3503
HT	IGSF9B	-2.04522	0.222693	-3.10298e+16	1.83181e-18	32.3484
HT	MFAP3	-2.03966	0.220839	-3.09454e+16	1.83712e-18	32.3428
HT	AGAP6	-2.0374	0.220087	-3.09112e+16	1.83929e-18	32.3406
HT	TRIM34	-2.03172	0.218194	-3.08251e+16	1.84476e-18	32.3348
HT	AC005520.3	-2.02944	0.217434	-3.07905e+16	1.84696e-18	32.3325
HT	DNAH11	-2.02849	0.217115	-3.0776e+16	1.84789e-18	32.3315
HT	KNSTRN	-2.02377	6.35718	-162.786	0.00286226	-35.5168
HT	ARMC7	2.01664	3.20731	19.5253	0.0273042	-39.8911
HT	LINC00861	2.01664	3.20731	19.5253	0.0273042	-39.8911
HT	AC010197.2	-2.01203	0.211631	-3.05264e+16	1.86397e-18	32.3147
HT	SOX9	2.00687	3.68622	18.5674	0.0288024	-39.9946
HT	VNN2	2.00687	3.68622	18.5674	0.0288024	-39.9946
HT	PDK1	2.00673	4.55029	20.0932	0.0264854	-39.8321
HT	ACP5	1.98803	4.78505	68.0892	0.007235	-37.3156
HT	AL589843.1	-1.95166	2.51344	-1.18578e+19	3.27673e-21	39.4135
HT	PAM16	-1.95166	2.51344	-1.18578e+19	3.27673e-21	39.4135
HT	PHLPP1	-1.95166	2.51344	-1.18578e+19	3.27673e-21	39.4135
HT	ZNF354C	-1.95166	2.51344	-1.18578e+19	3.27673e-21	39.4135
HT	IFITM1	1.91682	3.8475	63.852	0.0077468	-37.4482
HT	TK1	1.88656	3.60601	20.0808	0.0265028	-39.8334
HT	CD4	1.87028	5.82429	24.0734	0.0218585	-39.4599
HT	ATAD2	1.83061	3.56871	1.11223e+19	3.50776e-21	39.4126
HT	NRIP1	-1.81657	1.73144	-6890215652979070	9.08326e-18	29.2435
HT	PTPN14	-1.8131	4.32883	-11.5419	0.0476821	-40.9709
HT	H4C8	-1.80634	3.19163	-22.0234	0.0240265	-39.6432
HT	FEM1A	-1.80354	3.52577	-60.021	0.00827385	-37.5759
HT	CA12	1.79867	2.32503	59.859	0.00829768	-37.5814
HT	CCRL2	1.79867	2.32503	59.859	0.00829768	-37.5814
HT	SDC1	1.79867	2.32503	59.859	0.00829768	-37.5814
HT	SHISA2	1.79867	2.32503	59.859	0.00829768	-37.5814
HT	SMPD4BP	1.79867	2.32503	59.859	0.00829768	-37.5814
HT	STK39	1.79867	2.32503	59.859	0.00829768	-37.5814
HT	TRIM24	1.79867	2.32503	59.859	0.00829768	-37.5814
HT	KAZN	-1.79361	2.46075	-1.08975e+19	3.5848e-21	39.4123
HT	VANGL2	-1.79361	2.46075	-1.08975e+19	3.5848e-21	39.4123
HT	GTF2IRD2B	-1.76921	1.76301	-22.2476	0.0237693	-39.6224
HT	LSP1P4	-1.76027	1.71267	-6676660069821200	9.39269e-18	29.1785
HT	SPOCK2	1.75357	3.87992	23.2614	0.0226702	-39.5306
HT	PCSK7	1.74756	4.73066	123.912	0.00382639	-36.08
HT	FXYD5	1.74278	5.23653	55.4151	0.00900728	-37.7406
HT	LSP1	1.72921	5.91142	27.665	0.0188553	-39.1733
HT	CCL21	1.71548	8.17031	47.2626	0.0106686	-38.0689
HT	C3	1.69989	7.50948	128.712	0.00367478	-36.0015
HT	SEPTIN6	1.69117	5.18399	13.2832	0.0410892	-40.6829
HT	USP24	1.66459	3.45804	22.2254	0.0237946	-39.6244
HT	BMP4	-1.65399	4.57297	-15.2196	0.0355685	-40.4034
HT	RHBDF2	1.64941	0.64056	15.2418	0.0355136	-40.4005
HT	SAPCD1	1.64421	0.637095	16.5264	0.032592	-40.2341
HT	CXXC5	1.64086	3.80478	16.0404	0.0336409	-40.2955
HT	ROBO1	1.64086	3.80478	16.0404	0.0336409	-40.2955
HT	SLC29A3	1.64086	3.80478	16.0404	0.0336409	-40.2955
HT	U2AF2	1.64086	3.80478	16.0404	0.0336409	-40.2955
HT	KIF23	1.63246	0.629262	20.467	0.0259719	-39.7941
HT	COTL1	1.60636	3.41921	70.1703	0.00700695	-37.2535
HT	TBC1D3L	1.60112	4.0099	3943.47	9.63578e-05	-28.9382
HT	TREM2	1.59888	4.2784	25.3429	0.0206967	-39.354
HT	UAP1	1.59888	4.2784	25.3429	0.0206967	-39.354
HT	ZNF630	-1.59681	2.39515	-9.70181e+18	4.05664e-21	39.4102
HT	ZYG11A	-1.59681	2.39515	-9.70181e+18	4.05664e-21	39.4102
HT	OTUD5	1.5953	2.18945	29.5296	0.0175922	-39.0389
HT	ZFHX2-AS1	1.59099	0.601614	157.186	0.00297087	-35.5891
HT	SLC35B3	1.58867	0.600064	255.492	0.00177186	-34.5865
HT	CRPPA	-1.58496	1.65424	-6011740087573790	1.05018e-17	28.962
HT	FRG1CP	-1.58496	1.65424	-6011740087573790	1.05018e-17	28.962
HT	HRAS	-1.58496	1.65424	-6011740087573790	1.05018e-17	28.962
HT	IQCD	-1.58496	1.65424	-6011740087573790	1.05018e-17	28.962
HT	KDM8	-1.58496	1.65424	-6011740087573790	1.05018e-17	28.962
HT	LINC00526	-1.58496	1.65424	-6011740087573790	1.05018e-17	28.962
HT	LINC02696	-1.58496	1.65424	-6011740087573790	1.05018e-17	28.962
HT	MINCR	-1.58496	1.65424	-6011740087573790	1.05018e-17	28.962
HT	TRIM3	-1.58496	1.65424	-6011740087573790	1.05018e-17	28.962
HT	ABCC2	-1.58496	0.0692746	-2.40469e+16	2.40262e-18	31.8227
HT	ABRA	-1.58496	0.0692746	-2.40469e+16	2.40262e-18	31.8227
HT	AC002383.1	-1.58496	0.0692746	-2.40469e+16	2.40262e-18	31.8227
HT	AC003005.1	-1.58496	0.0692746	-2.40469e+16	2.40262e-18	31.8227
HT	AC004076.2	-1.58496	0.0692746	-2.40469e+16	2.40262e-18	31.8227
HT	AC004623.1	-1.58496	0.0692746	-2.40469e+16	2.40262e-18	31.8227
HT	AC004687.2	-1.58496	0.0692746	-2.40469e+16	2.40262e-18	31.8227
HT	AC004687.3	-1.58496	0.0692746	-2.40469e+16	2.40262e-18	31.8227
HT	AC005041.5	-1.58496	0.0692746	-2.40469e+16	2.40262e-18	31.8227
HT	AC005154.2	-1.58496	0.0692746	-2.40469e+16	2.40262e-18	31.8227
HT	AC005537.2	-1.58496	0.0692746	-2.40469e+16	2.40262e-18	31.8227
HT	AC005906.2	-1.58496	0.0692746	-2.40469e+16	2.40262e-18	31.8227
HT	AC006504.1	-1.58496	0.0692746	-2.40469e+16	2.40262e-18	31.8227
HT	AC007240.3	-1.58496	0.0692746	-2.40469e+16	2.40262e-18	31.8227
HT	AC007342.7	-1.58496	0.0692746	-2.40469e+16	2.40262e-18	31.8227
HT	AC007610.6	-1.58496	0.0692746	-2.40469e+16	2.40262e-18	31.8227
HT	AC007952.2	-1.58496	0.0692746	-2.40469e+16	2.40262e-18	31.8227
HT	AC008014.1	-1.58496	0.0692746	-2.40469e+16	2.40262e-18	31.8227
HT	AC008555.2	-1.58496	0.0692746	-2.40469e+16	2.40262e-18	31.8227
HT	AC008915.3	-1.58496	0.0692746	-2.40469e+16	2.40262e-18	31.8227
HT	AC009053.2	-1.58496	0.0692746	-2.40469e+16	2.40262e-18	31.8227
HT	AC009962.1	-1.58496	0.0692746	-2.40469e+16	2.40262e-18	31.8227
HT	AC010326.4	-1.58496	0.0692746	-2.40469e+16	2.40262e-18	31.8227
HT	AC010327.5	-1.58496	0.0692746	-2.40469e+16	2.40262e-18	31.8227
HT	AC010624.5	-1.58496	0.0692746	-2.40469e+16	2.40262e-18	31.8227
HT	AC011008.1	-1.58496	0.0692746	-2.40469e+16	2.40262e-18	31.8227
HT	AC011297.1	-1.58496	0.0692746	-2.40469e+16	2.40262e-18	31.8227
HT	AC011407.1	-1.58496	0.0692746	-2.40469e+16	2.40262e-18	31.8227
HT	AC011455.6	-1.58496	0.0692746	-2.40469e+16	2.40262e-18	31.8227
HT	AC011466.1	-1.58496	0.0692746	-2.40469e+16	2.40262e-18	31.8227
HT	AC011603.3	-1.58496	0.0692746	-2.40469e+16	2.40262e-18	31.8227
HT	AC012313.5	-1.58496	0.0692746	-2.40469e+16	2.40262e-18	31.8227
HT	AC012588.1	-1.58496	0.0692746	-2.40469e+16	2.40262e-18	31.8227
HT	AC012618.3	-1.58496	0.0692746	-2.40469e+16	2.40262e-18	31.8227
HT	AC016738.1	-1.58496	0.0692746	-2.40469e+16	2.40262e-18	31.8227
HT	AC017083.1	-1.58496	0.0692746	-2.40469e+16	2.40262e-18	31.8227
HT	AC018529.2	-1.58496	0.0692746	-2.40469e+16	2.40262e-18	31.8227
HT	AC018781.1	-1.58496	0.0692746	-2.40469e+16	2.40262e-18	31.8227
HT	AC021701.1	-1.58496	0.0692746	-2.40469e+16	2.40262e-18	31.8227
HT	AC021752.1	-1.58496	0.0692746	-2.40469e+16	2.40262e-18	31.8227
HT	AC022387.2	-1.58496	0.0692746	-2.40469e+16	2.40262e-18	31.8227
HT	AC022400.5	-1.58496	0.0692746	-2.40469e+16	2.40262e-18	31.8227
HT	AC022509.1	-1.58496	0.0692746	-2.40469e+16	2.40262e-18	31.8227
HT	AC023024.1	-1.58496	0.0692746	-2.40469e+16	2.40262e-18	31.8227
HT	AC023424.2	-1.58496	0.0692746	-2.40469e+16	2.40262e-18	31.8227
HT	AC023818.1	-1.58496	0.0692746	-2.40469e+16	2.40262e-18	31.8227
HT	AC024560.5	-1.58496	0.0692746	-2.40469e+16	2.40262e-18	31.8227
HT	AC025280.2	-1.58496	0.0692746	-2.40469e+16	2.40262e-18	31.8227
HT	AC026748.1	-1.58496	0.0692746	-2.40469e+16	2.40262e-18	31.8227
HT	AC027117.1	-1.58496	0.0692746	-2.40469e+16	2.40262e-18	31.8227
HT	AC034213.1	-1.58496	0.0692746	-2.40469e+16	2.40262e-18	31.8227
HT	AC040160.2	-1.58496	0.0692746	-2.40469e+16	2.40262e-18	31.8227
HT	AC046143.1	-1.58496	0.0692746	-2.40469e+16	2.40262e-18	31.8227
HT	AC058791.1	-1.58496	0.0692746	-2.40469e+16	2.40262e-18	31.8227
HT	AC068860.1	-1.58496	0.0692746	-2.40469e+16	2.40262e-18	31.8227
HT	AC073585.1	-1.58496	0.0692746	-2.40469e+16	2.40262e-18	31.8227
HT	AC073611.1	-1.58496	0.0692746	-2.40469e+16	2.40262e-18	31.8227
HT	AC073957.3	-1.58496	0.0692746	-2.40469e+16	2.40262e-18	31.8227
HT	AC079089.1	-1.58496	0.0692746	-2.40469e+16	2.40262e-18	31.8227
HT	AC079834.2	-1.58496	0.0692746	-2.40469e+16	2.40262e-18	31.8227
HT	AC079848.2	-1.58496	0.0692746	-2.40469e+16	2.40262e-18	31.8227
HT	AC083805.1	-1.58496	0.0692746	-2.40469e+16	2.40262e-18	31.8227
HT	AC087239.1	-1.58496	0.0692746	-2.40469e+16	2.40262e-18	31.8227
HT	AC090004.2	-1.58496	0.0692746	-2.40469e+16	2.40262e-18	31.8227
HT	AC090241.2	-1.58496	0.0692746	-2.40469e+16	2.40262e-18	31.8227
HT	AC090616.6	-1.58496	0.0692746	-2.40469e+16	2.40262e-18	31.8227
HT	AC090983.1	-1.58496	0.0692746	-2.40469e+16	2.40262e-18	31.8227
HT	AC091390.5	-1.58496	0.0692746	-2.40469e+16	2.40262e-18	31.8227
HT	AC092134.1	-1.58496	0.0692746	-2.40469e+16	2.40262e-18	31.8227
HT	AC092376.2	-1.58496	0.0692746	-2.40469e+16	2.40262e-18	31.8227
HT	AC092428.1	-1.58496	0.0692746	-2.40469e+16	2.40262e-18	31.8227
HT	AC092587.1	-1.58496	0.0692746	-2.40469e+16	2.40262e-18	31.8227
HT	AC092821.2	-1.58496	0.0692746	-2.40469e+16	2.40262e-18	31.8227
HT	AC093677.2	-1.58496	0.0692746	-2.40469e+16	2.40262e-18	31.8227
HT	AC093788.1	-1.58496	0.0692746	-2.40469e+16	2.40262e-18	31.8227
HT	AC093843.1	-1.58496	0.0692746	-2.40469e+16	2.40262e-18	31.8227
HT	AC093899.2	-1.58496	0.0692746	-2.40469e+16	2.40262e-18	31.8227
HT	AC095032.1	-1.58496	0.0692746	-2.40469e+16	2.40262e-18	31.8227
HT	AC097382.3	-1.58496	0.0692746	-2.40469e+16	2.40262e-18	31.8227
HT	AC098850.3	-1.58496	0.0692746	-2.40469e+16	2.40262e-18	31.8227
HT	AC099850.2	-1.58496	0.0692746	-2.40469e+16	2.40262e-18	31.8227
HT	AC103740.1	-1.58496	0.0692746	-2.40469e+16	2.40262e-18	31.8227
HT	AC103760.1	-1.58496	0.0692746	-2.40469e+16	2.40262e-18	31.8227
HT	AC104109.2	-1.58496	0.0692746	-2.40469e+16	2.40262e-18	31.8227
HT	AC104162.2	-1.58496	0.0692746	-2.40469e+16	2.40262e-18	31.8227
HT	AC104335.2	-1.58496	0.0692746	-2.40469e+16	2.40262e-18	31.8227
HT	AC104472.4	-1.58496	0.0692746	-2.40469e+16	2.40262e-18	31.8227
HT	AC105206.1	-1.58496	0.0692746	-2.40469e+16	2.40262e-18	31.8227
HT	AC105233.4	-1.58496	0.0692746	-2.40469e+16	2.40262e-18	31.8227
HT	AC105285.1	-1.58496	0.0692746	-2.40469e+16	2.40262e-18	31.8227
HT	AC105339.2	-1.58496	0.0692746	-2.40469e+16	2.40262e-18	31.8227
HT	AC106865.1	-1.58496	0.0692746	-2.40469e+16	2.40262e-18	31.8227
HT	AC108676.1	-1.58496	0.0692746	-2.40469e+16	2.40262e-18	31.8227
HT	AC108704.2	-1.58496	0.0692746	-2.40469e+16	2.40262e-18	31.8227
HT	AC114271.1	-1.58496	0.0692746	-2.40469e+16	2.40262e-18	31.8227
HT	AC114811.2	-1.58496	0.0692746	-2.40469e+16	2.40262e-18	31.8227
HT	AC116562.3	-1.58496	0.0692746	-2.40469e+16	2.40262e-18	31.8227
HT	AC117453.1	-1.58496	0.0692746	-2.40469e+16	2.40262e-18	31.8227
HT	AC120057.3	-1.58496	0.0692746	-2.40469e+16	2.40262e-18	31.8227
HT	AC123595.1	-1.58496	0.0692746	-2.40469e+16	2.40262e-18	31.8227
HT	AC123768.3	-1.58496	0.0692746	-2.40469e+16	2.40262e-18	31.8227
HT	AC130466.1	-1.58496	0.0692746	-2.40469e+16	2.40262e-18	31.8227
HT	AC134504.1	-1.58496	0.0692746	-2.40469e+16	2.40262e-18	31.8227
HT	AC137936.1	-1.58496	0.0692746	-2.40469e+16	2.40262e-18	31.8227
HT	AC139256.3	-1.58496	0.0692746	-2.40469e+16	2.40262e-18	31.8227
HT	AC226118.1	-1.58496	0.0692746	-2.40469e+16	2.40262e-18	31.8227
HT	AC231981.1	-1.58496	0.0692746	-2.40469e+16	2.40262e-18	31.8227
HT	AC234582.1	-1.58496	0.0692746	-2.40469e+16	2.40262e-18	31.8227
HT	AC241952.2	-1.58496	0.0692746	-2.40469e+16	2.40262e-18	31.8227
HT	AC243960.3	-1.58496	0.0692746	-2.40469e+16	2.40262e-18	31.8227
HT	AC245033.1	-1.58496	0.0692746	-2.40469e+16	2.40262e-18	31.8227
HT	AC253572.1	-1.58496	0.0692746	-2.40469e+16	2.40262e-18	31.8227
HT	ACKR2	-1.58496	0.0692746	-2.40469e+16	2.40262e-18	31.8227
HT	ACTA1	-1.58496	0.0692746	-2.40469e+16	2.40262e-18	31.8227
HT	ACTC1	-1.58496	0.0692746	-2.40469e+16	2.40262e-18	31.8227
HT	AD000864.1	-1.58496	0.0692746	-2.40469e+16	2.40262e-18	31.8227
HT	ADAMTSL5	-1.58496	0.0692746	-2.40469e+16	2.40262e-18	31.8227
HT	AGAP9	-1.58496	0.0692746	-2.40469e+16	2.40262e-18	31.8227
HT	AKR7A3	-1.58496	0.0692746	-2.40469e+16	2.40262e-18	31.8227
HT	AL009176.1	-1.58496	0.0692746	-2.40469e+16	2.40262e-18	31.8227
HT	AL049543.1	-1.58496	0.0692746	-2.40469e+16	2.40262e-18	31.8227
HT	AL049780.3	-1.58496	0.0692746	-2.40469e+16	2.40262e-18	31.8227
HT	AL078590.2	-1.58496	0.0692746	-2.40469e+16	2.40262e-18	31.8227
HT	AL078622.1	-1.58496	0.0692746	-2.40469e+16	2.40262e-18	31.8227
HT	AL096712.2	-1.58496	0.0692746	-2.40469e+16	2.40262e-18	31.8227
HT	AL109628.2	-1.58496	0.0692746	-2.40469e+16	2.40262e-18	31.8227
HT	AL109811.2	-1.58496	0.0692746	-2.40469e+16	2.40262e-18	31.8227
HT	AL109840.2	-1.58496	0.0692746	-2.40469e+16	2.40262e-18	31.8227
HT	AL121768.1	-1.58496	0.0692746	-2.40469e+16	2.40262e-18	31.8227
HT	AL121809.2	-1.58496	0.0692746	-2.40469e+16	2.40262e-18	31.8227
HT	AL132639.2	-1.58496	0.0692746	-2.40469e+16	2.40262e-18	31.8227
HT	AL132800.1	-1.58496	0.0692746	-2.40469e+16	2.40262e-18	31.8227
HT	AL136038.5	-1.58496	0.0692746	-2.40469e+16	2.40262e-18	31.8227
HT	AL136171.2	-1.58496	0.0692746	-2.40469e+16	2.40262e-18	31.8227
HT	AL136419.3	-1.58496	0.0692746	-2.40469e+16	2.40262e-18	31.8227
HT	AL136982.1	-1.58496	0.0692746	-2.40469e+16	2.40262e-18	31.8227
HT	AL138787.1	-1.58496	0.0692746	-2.40469e+16	2.40262e-18	31.8227
HT	AL138824.1	-1.58496	0.0692746	-2.40469e+16	2.40262e-18	31.8227
HT	AL138899.1	-1.58496	0.0692746	-2.40469e+16	2.40262e-18	31.8227
HT	AL139095.5	-1.58496	0.0692746	-2.40469e+16	2.40262e-18	31.8227
HT	AL157886.1	-1.58496	0.0692746	-2.40469e+16	2.40262e-18	31.8227
HT	AL163051.1	-1.58496	0.0692746	-2.40469e+16	2.40262e-18	31.8227
HT	AL355334.2	-1.58496	0.0692746	-2.40469e+16	2.40262e-18	31.8227
HT	AL355482.1	-1.58496	0.0692746	-2.40469e+16	2.40262e-18	31.8227
HT	AL355999.1	-1.58496	0.0692746	-2.40469e+16	2.40262e-18	31.8227
HT	AL357054.4	-1.58496	0.0692746	-2.40469e+16	2.40262e-18	31.8227
HT	AL357079.1	-1.58496	0.0692746	-2.40469e+16	2.40262e-18	31.8227
HT	AL358472.2	-1.58496	0.0692746	-2.40469e+16	2.40262e-18	31.8227
HT	AL358852.1	-1.58496	0.0692746	-2.40469e+16	2.40262e-18	31.8227
HT	AL359183.1	-1.58496	0.0692746	-2.40469e+16	2.40262e-18	31.8227
HT	AL359643.2	-1.58496	0.0692746	-2.40469e+16	2.40262e-18	31.8227
HT	AL359878.1	-1.58496	0.0692746	-2.40469e+16	2.40262e-18	31.8227
HT	AL365361.1	-1.58496	0.0692746	-2.40469e+16	2.40262e-18	31.8227
HT	AL390728.4	-1.58496	0.0692746	-2.40469e+16	2.40262e-18	31.8227
HT	AL391832.2	-1.58496	0.0692746	-2.40469e+16	2.40262e-18	31.8227
HT	AL442067.3	-1.58496	0.0692746	-2.40469e+16	2.40262e-18	31.8227
HT	AL445426.1	-1.58496	0.0692746	-2.40469e+16	2.40262e-18	31.8227
HT	AL450992.2	-1.58496	0.0692746	-2.40469e+16	2.40262e-18	31.8227
HT	AL451069.1	-1.58496	0.0692746	-2.40469e+16	2.40262e-18	31.8227
HT	AL513217.1	-1.58496	0.0692746	-2.40469e+16	2.40262e-18	31.8227
HT	AL513548.1	-1.58496	0.0692746	-2.40469e+16	2.40262e-18	31.8227
HT	AL590004.3	-1.58496	0.0692746	-2.40469e+16	2.40262e-18	31.8227
HT	AL591463.1	-1.58496	0.0692746	-2.40469e+16	2.40262e-18	31.8227
HT	AL592295.5	-1.58496	0.0692746	-2.40469e+16	2.40262e-18	31.8227
HT	AL627171.4	-1.58496	0.0692746	-2.40469e+16	2.40262e-18	31.8227
HT	AL627309.1	-1.58496	0.0692746	-2.40469e+16	2.40262e-18	31.8227
HT	AL662884.5	-1.58496	0.0692746	-2.40469e+16	2.40262e-18	31.8227
HT	AL672310.1	-1.58496	0.0692746	-2.40469e+16	2.40262e-18	31.8227
HT	ALDH1L1-AS2	-1.58496	0.0692746	-2.40469e+16	2.40262e-18	31.8227
HT	ALDH3A1	-1.58496	0.0692746	-2.40469e+16	2.40262e-18	31.8227
HT	ALKBH8	-1.58496	0.0692746	-2.40469e+16	2.40262e-18	31.8227
HT	ALOX12B	-1.58496	0.0692746	-2.40469e+16	2.40262e-18	31.8227
HT	ANGPT4	-1.58496	0.0692746	-2.40469e+16	2.40262e-18	31.8227
HT	ANKRD55	-1.58496	0.0692746	-2.40469e+16	2.40262e-18	31.8227
HT	ANKS1B	-1.58496	0.0692746	-2.40469e+16	2.40262e-18	31.8227
HT	ANO7	-1.58496	0.0692746	-2.40469e+16	2.40262e-18	31.8227
HT	AP000346.2	-1.58496	0.0692746	-2.40469e+16	2.40262e-18	31.8227
HT	AP000662.1	-1.58496	0.0692746	-2.40469e+16	2.40262e-18	31.8227
HT	AP001021.1	-1.58496	0.0692746	-2.40469e+16	2.40262e-18	31.8227
HT	AP001107.1	-1.58496	0.0692746	-2.40469e+16	2.40262e-18	31.8227
HT	AP001267.2	-1.58496	0.0692746	-2.40469e+16	2.40262e-18	31.8227
HT	AP002800.1	-1.58496	0.0692746	-2.40469e+16	2.40262e-18	31.8227
HT	AP002813.1	-1.58496	0.0692746	-2.40469e+16	2.40262e-18	31.8227
HT	AP003119.3	-1.58496	0.0692746	-2.40469e+16	2.40262e-18	31.8227
HT	AP004608.1	-1.58496	0.0692746	-2.40469e+16	2.40262e-18	31.8227
HT	AP005264.7	-1.58496	0.0692746	-2.40469e+16	2.40262e-18	31.8227
HT	AP005329.3	-1.58496	0.0692746	-2.40469e+16	2.40262e-18	31.8227
HT	AQP4-AS1	-1.58496	0.0692746	-2.40469e+16	2.40262e-18	31.8227
HT	ARF4-AS1	-1.58496	0.0692746	-2.40469e+16	2.40262e-18	31.8227
HT	ARHGAP23	-1.58496	0.0692746	-2.40469e+16	2.40262e-18	31.8227
HT	ARMH2	-1.58496	0.0692746	-2.40469e+16	2.40262e-18	31.8227
HT	ARRDC3-AS1	-1.58496	0.0692746	-2.40469e+16	2.40262e-18	31.8227
HT	ARSF	-1.58496	0.0692746	-2.40469e+16	2.40262e-18	31.8227
HT	ART3	-1.58496	0.0692746	-2.40469e+16	2.40262e-18	31.8227
HT	ASGR2	-1.58496	0.0692746	-2.40469e+16	2.40262e-18	31.8227
HT	ATE1-AS1	-1.58496	0.0692746	-2.40469e+16	2.40262e-18	31.8227
HT	ATP10A	-1.58496	0.0692746	-2.40469e+16	2.40262e-18	31.8227
HT	ATRNL1	-1.58496	0.0692746	-2.40469e+16	2.40262e-18	31.8227
HT	B3GNT9	-1.58496	0.0692746	-2.40469e+16	2.40262e-18	31.8227
HT	B4GALNT3	-1.58496	0.0692746	-2.40469e+16	2.40262e-18	31.8227
HT	BAALC	-1.58496	0.0692746	-2.40469e+16	2.40262e-18	31.8227
HT	BAMBI	-1.58496	0.0692746	-2.40469e+16	2.40262e-18	31.8227
HT	BCL2L10	-1.58496	0.0692746	-2.40469e+16	2.40262e-18	31.8227
HT	BOK	-1.58496	0.0692746	-2.40469e+16	2.40262e-18	31.8227
HT	BOLA2B	-1.58496	0.0692746	-2.40469e+16	2.40262e-18	31.8227
HT	BRS3	-1.58496	0.0692746	-2.40469e+16	2.40262e-18	31.8227
HT	BSN	-1.58496	0.0692746	-2.40469e+16	2.40262e-18	31.8227
HT	BX470102.2	-1.58496	0.0692746	-2.40469e+16	2.40262e-18	31.8227
HT	C10orf67	-1.58496	0.0692746	-2.40469e+16	2.40262e-18	31.8227
HT	C18orf54	-1.58496	0.0692746	-2.40469e+16	2.40262e-18	31.8227
HT	C19orf57	-1.58496	0.0692746	-2.40469e+16	2.40262e-18	31.8227
HT	C1GALT1C1L	-1.58496	0.0692746	-2.40469e+16	2.40262e-18	31.8227
HT	C1orf194	-1.58496	0.0692746	-2.40469e+16	2.40262e-18	31.8227
HT	C1QTNF12	-1.58496	0.0692746	-2.40469e+16	2.40262e-18	31.8227
HT	C20orf194	-1.58496	0.0692746	-2.40469e+16	2.40262e-18	31.8227
HT	C20orf203	-1.58496	0.0692746	-2.40469e+16	2.40262e-18	31.8227
HT	C2orf15	-1.58496	0.0692746	-2.40469e+16	2.40262e-18	31.8227
HT	C5AR2	-1.58496	0.0692746	-2.40469e+16	2.40262e-18	31.8227
HT	C5orf17	-1.58496	0.0692746	-2.40469e+16	2.40262e-18	31.8227
HT	C6orf141	-1.58496	0.0692746	-2.40469e+16	2.40262e-18	31.8227
HT	C6orf99	-1.58496	0.0692746	-2.40469e+16	2.40262e-18	31.8227
HT	C8orf34	-1.58496	0.0692746	-2.40469e+16	2.40262e-18	31.8227
HT	CA8	-1.58496	0.0692746	-2.40469e+16	2.40262e-18	31.8227
HT	CACNG5	-1.58496	0.0692746	-2.40469e+16	2.40262e-18	31.8227
HT	CACTIN	-1.58496	0.0692746	-2.40469e+16	2.40262e-18	31.8227
HT	CALB1	-1.58496	0.0692746	-2.40469e+16	2.40262e-18	31.8227
HT	CAMK1D	-1.58496	0.0692746	-2.40469e+16	2.40262e-18	31.8227
HT	CARD10	-1.58496	0.0692746	-2.40469e+16	2.40262e-18	31.8227
HT	CARTPT	-1.58496	0.0692746	-2.40469e+16	2.40262e-18	31.8227
HT	CATSPER3	-1.58496	0.0692746	-2.40469e+16	2.40262e-18	31.8227
HT	CATSPERZ	-1.58496	0.0692746	-2.40469e+16	2.40262e-18	31.8227
HT	CCDC121	-1.58496	0.0692746	-2.40469e+16	2.40262e-18	31.8227
HT	CCDC150	-1.58496	0.0692746	-2.40469e+16	2.40262e-18	31.8227
HT	CCDC187	-1.58496	0.0692746	-2.40469e+16	2.40262e-18	31.8227
HT	CCDC3	-1.58496	0.0692746	-2.40469e+16	2.40262e-18	31.8227
HT	CCDC36	-1.58496	0.0692746	-2.40469e+16	2.40262e-18	31.8227
HT	CCDC81	-1.58496	0.0692746	-2.40469e+16	2.40262e-18	31.8227
HT	CCDC87	-1.58496	0.0692746	-2.40469e+16	2.40262e-18	31.8227
HT	CCDC96	-1.58496	0.0692746	-2.40469e+16	2.40262e-18	31.8227
HT	CCK	-1.58496	0.0692746	-2.40469e+16	2.40262e-18	31.8227
HT	CDH8	-1.58496	0.0692746	-2.40469e+16	2.40262e-18	31.8227
HT	CDK5R1	-1.58496	0.0692746	-2.40469e+16	2.40262e-18	31.8227
HT	CECR2	-1.58496	0.0692746	-2.40469e+16	2.40262e-18	31.8227
HT	CECR7	-1.58496	0.0692746	-2.40469e+16	2.40262e-18	31.8227
HT	CHST9	-1.58496	0.0692746	-2.40469e+16	2.40262e-18	31.8227
HT	CNNM1	-1.58496	0.0692746	-2.40469e+16	2.40262e-18	31.8227
HT	COMP	-1.58496	0.0692746	-2.40469e+16	2.40262e-18	31.8227
HT	CPT1C	-1.58496	0.0692746	-2.40469e+16	2.40262e-18	31.8227
HT	CR1L	-1.58496	0.0692746	-2.40469e+16	2.40262e-18	31.8227
HT	CRNDE	-1.58496	0.0692746	-2.40469e+16	2.40262e-18	31.8227
HT	CRYM-AS1	-1.58496	0.0692746	-2.40469e+16	2.40262e-18	31.8227
HT	CSPG4P11	-1.58496	0.0692746	-2.40469e+16	2.40262e-18	31.8227
HT	CSPG5	-1.58496	0.0692746	-2.40469e+16	2.40262e-18	31.8227
HT	CST2	-1.58496	0.0692746	-2.40469e+16	2.40262e-18	31.8227
HT	CTXN2	-1.58496	0.0692746	-2.40469e+16	2.40262e-18	31.8227
HT	CU638689.4	-1.58496	0.0692746	-2.40469e+16	2.40262e-18	31.8227
HT	CYP4F26P	-1.58496	0.0692746	-2.40469e+16	2.40262e-18	31.8227
HT	DAGLA	-1.58496	0.0692746	-2.40469e+16	2.40262e-18	31.8227
HT	DANT2	-1.58496	0.0692746	-2.40469e+16	2.40262e-18	31.8227
HT	DARS-AS1	-1.58496	0.0692746	-2.40469e+16	2.40262e-18	31.8227
HT	DCDC2C	-1.58496	0.0692746	-2.40469e+16	2.40262e-18	31.8227
HT	DCT	-1.58496	0.0692746	-2.40469e+16	2.40262e-18	31.8227
HT	DDX59-AS1	-1.58496	0.0692746	-2.40469e+16	2.40262e-18	31.8227
HT	DGKK	-1.58496	0.0692746	-2.40469e+16	2.40262e-18	31.8227
HT	DLGAP1	-1.58496	0.0692746	-2.40469e+16	2.40262e-18	31.8227
HT	DLX6-AS1	-1.58496	0.0692746	-2.40469e+16	2.40262e-18	31.8227
HT	DNAH10OS	-1.58496	0.0692746	-2.40469e+16	2.40262e-18	31.8227
HT	DNAH17	-1.58496	0.0692746	-2.40469e+16	2.40262e-18	31.8227
HT	DNAI1	-1.58496	0.0692746	-2.40469e+16	2.40262e-18	31.8227
HT	DNM1P35	-1.58496	0.0692746	-2.40469e+16	2.40262e-18	31.8227
HT	DOK6	-1.58496	0.0692746	-2.40469e+16	2.40262e-18	31.8227
HT	DRC7	-1.58496	0.0692746	-2.40469e+16	2.40262e-18	31.8227
HT	ECT2L	-1.58496	0.0692746	-2.40469e+16	2.40262e-18	31.8227
HT	EID3	-1.58496	0.0692746	-2.40469e+16	2.40262e-18	31.8227
HT	EIF2S3B	-1.58496	0.0692746	-2.40469e+16	2.40262e-18	31.8227
HT	ELOVL2-AS1	-1.58496	0.0692746	-2.40469e+16	2.40262e-18	31.8227
HT	EME2	-1.58496	0.0692746	-2.40469e+16	2.40262e-18	31.8227
HT	EMX2	-1.58496	0.0692746	-2.40469e+16	2.40262e-18	31.8227
HT	EMX2OS	-1.58496	0.0692746	-2.40469e+16	2.40262e-18	31.8227
HT	EPHA5	-1.58496	0.0692746	-2.40469e+16	2.40262e-18	31.8227
HT	ERC2	-1.58496	0.0692746	-2.40469e+16	2.40262e-18	31.8227
HT	ETV2	-1.58496	0.0692746	-2.40469e+16	2.40262e-18	31.8227
HT	EVI5L	-1.58496	0.0692746	-2.40469e+16	2.40262e-18	31.8227
HT	EXOC3L1	-1.58496	0.0692746	-2.40469e+16	2.40262e-18	31.8227
HT	EYA1	-1.58496	0.0692746	-2.40469e+16	2.40262e-18	31.8227
HT	F7	-1.58496	0.0692746	-2.40469e+16	2.40262e-18	31.8227
HT	FAM110D	-1.58496	0.0692746	-2.40469e+16	2.40262e-18	31.8227
HT	FAM131C	-1.58496	0.0692746	-2.40469e+16	2.40262e-18	31.8227
HT	FAM174C	-1.58496	0.0692746	-2.40469e+16	2.40262e-18	31.8227
HT	FAM189B	-1.58496	0.0692746	-2.40469e+16	2.40262e-18	31.8227
HT	FAM229A	-1.58496	0.0692746	-2.40469e+16	2.40262e-18	31.8227
HT	FAM47E-STBD1	-1.58496	0.0692746	-2.40469e+16	2.40262e-18	31.8227
HT	FBRSL1	-1.58496	0.0692746	-2.40469e+16	2.40262e-18	31.8227
HT	FCAR	-1.58496	0.0692746	-2.40469e+16	2.40262e-18	31.8227
HT	FCGR2C	-1.58496	0.0692746	-2.40469e+16	2.40262e-18	31.8227
HT	FGF17	-1.58496	0.0692746	-2.40469e+16	2.40262e-18	31.8227
HT	FGF23	-1.58496	0.0692746	-2.40469e+16	2.40262e-18	31.8227
HT	FGFR3	-1.58496	0.0692746	-2.40469e+16	2.40262e-18	31.8227
HT	FHAD1-AS1	-1.58496	0.0692746	-2.40469e+16	2.40262e-18	31.8227
HT	FMR1-AS1	-1.58496	0.0692746	-2.40469e+16	2.40262e-18	31.8227
HT	FOLH1	-1.58496	0.0692746	-2.40469e+16	2.40262e-18	31.8227
HT	FOSL1	-1.58496	0.0692746	-2.40469e+16	2.40262e-18	31.8227
HT	FOXF2	-1.58496	0.0692746	-2.40469e+16	2.40262e-18	31.8227
HT	FOXO3B	-1.58496	0.0692746	-2.40469e+16	2.40262e-18	31.8227
HT	FSTL4	-1.58496	0.0692746	-2.40469e+16	2.40262e-18	31.8227
HT	GAS2L1	-1.58496	0.0692746	-2.40469e+16	2.40262e-18	31.8227
HT	GATA1	-1.58496	0.0692746	-2.40469e+16	2.40262e-18	31.8227
HT	GBP1P1	-1.58496	0.0692746	-2.40469e+16	2.40262e-18	31.8227
HT	GCNA	-1.58496	0.0692746	-2.40469e+16	2.40262e-18	31.8227
HT	GDF5	-1.58496	0.0692746	-2.40469e+16	2.40262e-18	31.8227
HT	GFRA3	-1.58496	0.0692746	-2.40469e+16	2.40262e-18	31.8227
HT	GGT6	-1.58496	0.0692746	-2.40469e+16	2.40262e-18	31.8227
HT	GGTLC2	-1.58496	0.0692746	-2.40469e+16	2.40262e-18	31.8227
HT	GNAT3	-1.58496	0.0692746	-2.40469e+16	2.40262e-18	31.8227
HT	GNAZ	-1.58496	0.0692746	-2.40469e+16	2.40262e-18	31.8227
HT	GOLGA8S	-1.58496	0.0692746	-2.40469e+16	2.40262e-18	31.8227
HT	GUCA1B	-1.58496	0.0692746	-2.40469e+16	2.40262e-18	31.8227
HT	GUCY1B1	-1.58496	0.0692746	-2.40469e+16	2.40262e-18	31.8227
HT	H2AZ1-DT	-1.58496	0.0692746	-2.40469e+16	2.40262e-18	31.8227
HT	HAS3	-1.58496	0.0692746	-2.40469e+16	2.40262e-18	31.8227
HT	HCG22	-1.58496	0.0692746	-2.40469e+16	2.40262e-18	31.8227
HT	HCN3	-1.58496	0.0692746	-2.40469e+16	2.40262e-18	31.8227
HT	HDAC4	-1.58496	0.0692746	-2.40469e+16	2.40262e-18	31.8227
HT	HEPHL1	-1.58496	0.0692746	-2.40469e+16	2.40262e-18	31.8227
HT	HERC2P5	-1.58496	0.0692746	-2.40469e+16	2.40262e-18	31.8227
HT	HHIP-AS1	-1.58496	0.0692746	-2.40469e+16	2.40262e-18	31.8227
HT	HIF1A-AS3	-1.58496	0.0692746	-2.40469e+16	2.40262e-18	31.8227
HT	HOMER3-AS1	-1.58496	0.0692746	-2.40469e+16	2.40262e-18	31.8227
HT	HOTAIRM1	-1.58496	0.0692746	-2.40469e+16	2.40262e-18	31.8227
HT	HOXC10	-1.58496	0.0692746	-2.40469e+16	2.40262e-18	31.8227
HT	HPD	-1.58496	0.0692746	-2.40469e+16	2.40262e-18	31.8227
HT	HR	-1.58496	0.0692746	-2.40469e+16	2.40262e-18	31.8227
HT	HSD17B3	-1.58496	0.0692746	-2.40469e+16	2.40262e-18	31.8227
HT	HSPA7	-1.58496	0.0692746	-2.40469e+16	2.40262e-18	31.8227
HT	ID2-AS1	-1.58496	0.0692746	-2.40469e+16	2.40262e-18	31.8227
HT	IGHV3-30	-1.58496	0.0692746	-2.40469e+16	2.40262e-18	31.8227
HT	IL17RD	-1.58496	0.0692746	-2.40469e+16	2.40262e-18	31.8227
HT	INHBA-AS1	-1.58496	0.0692746	-2.40469e+16	2.40262e-18	31.8227
HT	INKA2-AS1	-1.58496	0.0692746	-2.40469e+16	2.40262e-18	31.8227
HT	INSYN1-AS1	-1.58496	0.0692746	-2.40469e+16	2.40262e-18	31.8227
HT	IQSEC3	-1.58496	0.0692746	-2.40469e+16	2.40262e-18	31.8227
HT	ITIH3	-1.58496	0.0692746	-2.40469e+16	2.40262e-18	31.8227
HT	KAAG1	-1.58496	0.0692746	-2.40469e+16	2.40262e-18	31.8227
HT	KCNA5	-1.58496	0.0692746	-2.40469e+16	2.40262e-18	31.8227
HT	KCND3	-1.58496	0.0692746	-2.40469e+16	2.40262e-18	31.8227
HT	KCNK17	-1.58496	0.0692746	-2.40469e+16	2.40262e-18	31.8227
HT	KCNK5	-1.58496	0.0692746	-2.40469e+16	2.40262e-18	31.8227
HT	KCNS3	-1.58496	0.0692746	-2.40469e+16	2.40262e-18	31.8227
HT	KCNV1	-1.58496	0.0692746	-2.40469e+16	2.40262e-18	31.8227
HT	KDM4A-AS1	-1.58496	0.0692746	-2.40469e+16	2.40262e-18	31.8227
HT	KIAA1257	-1.58496	0.0692746	-2.40469e+16	2.40262e-18	31.8227
HT	KL	-1.58496	0.0692746	-2.40469e+16	2.40262e-18	31.8227
HT	KRT7-AS	-1.58496	0.0692746	-2.40469e+16	2.40262e-18	31.8227
HT	L1TD1	-1.58496	0.0692746	-2.40469e+16	2.40262e-18	31.8227
HT	LAMB4	-1.58496	0.0692746	-2.40469e+16	2.40262e-18	31.8227
HT	LERFS	-1.58496	0.0692746	-2.40469e+16	2.40262e-18	31.8227
HT	LGALS7B	-1.58496	0.0692746	-2.40469e+16	2.40262e-18	31.8227
HT	LHX6	-1.58496	0.0692746	-2.40469e+16	2.40262e-18	31.8227
HT	LINC00200	-1.58496	0.0692746	-2.40469e+16	2.40262e-18	31.8227
HT	LINC00294	-1.58496	0.0692746	-2.40469e+16	2.40262e-18	31.8227
HT	LINC00501	-1.58496	0.0692746	-2.40469e+16	2.40262e-18	31.8227
HT	LINC00638	-1.58496	0.0692746	-2.40469e+16	2.40262e-18	31.8227
HT	LINC00639	-1.58496	0.0692746	-2.40469e+16	2.40262e-18	31.8227
HT	LINC00671	-1.58496	0.0692746	-2.40469e+16	2.40262e-18	31.8227
HT	LINC00937	-1.58496	0.0692746	-2.40469e+16	2.40262e-18	31.8227
HT	LINC01031	-1.58496	0.0692746	-2.40469e+16	2.40262e-18	31.8227
HT	LINC01123	-1.58496	0.0692746	-2.40469e+16	2.40262e-18	31.8227
HT	LINC01126	-1.58496	0.0692746	-2.40469e+16	2.40262e-18	31.8227
HT	LINC01235	-1.58496	0.0692746	-2.40469e+16	2.40262e-18	31.8227
HT	LINC01266	-1.58496	0.0692746	-2.40469e+16	2.40262e-18	31.8227
HT	LINC01347	-1.58496	0.0692746	-2.40469e+16	2.40262e-18	31.8227
HT	LINC01356	-1.58496	0.0692746	-2.40469e+16	2.40262e-18	31.8227
HT	LINC01426	-1.58496	0.0692746	-2.40469e+16	2.40262e-18	31.8227
HT	LINC01446	-1.58496	0.0692746	-2.40469e+16	2.40262e-18	31.8227
HT	LINC01600	-1.58496	0.0692746	-2.40469e+16	2.40262e-18	31.8227
HT	LINC01625	-1.58496	0.0692746	-2.40469e+16	2.40262e-18	31.8227
HT	LINC01725	-1.58496	0.0692746	-2.40469e+16	2.40262e-18	31.8227
HT	LINC01730	-1.58496	0.0692746	-2.40469e+16	2.40262e-18	31.8227
HT	LINC01736	-1.58496	0.0692746	-2.40469e+16	2.40262e-18	31.8227
HT	LINC01785	-1.58496	0.0692746	-2.40469e+16	2.40262e-18	31.8227
HT	LINC01807	-1.58496	0.0692746	-2.40469e+16	2.40262e-18	31.8227
HT	LINC01837	-1.58496	0.0692746	-2.40469e+16	2.40262e-18	31.8227
HT	LINC01852	-1.58496	0.0692746	-2.40469e+16	2.40262e-18	31.8227
HT	LINC01863	-1.58496	0.0692746	-2.40469e+16	2.40262e-18	31.8227
HT	LINC02076	-1.58496	0.0692746	-2.40469e+16	2.40262e-18	31.8227
HT	LINC02235	-1.58496	0.0692746	-2.40469e+16	2.40262e-18	31.8227
HT	LINC02245	-1.58496	0.0692746	-2.40469e+16	2.40262e-18	31.8227
HT	LINC02532	-1.58496	0.0692746	-2.40469e+16	2.40262e-18	31.8227
HT	LINC02591	-1.58496	0.0692746	-2.40469e+16	2.40262e-18	31.8227
HT	LINC02613	-1.58496	0.0692746	-2.40469e+16	2.40262e-18	31.8227
HT	LINC02701	-1.58496	0.0692746	-2.40469e+16	2.40262e-18	31.8227
HT	LINC02709	-1.58496	0.0692746	-2.40469e+16	2.40262e-18	31.8227
HT	LINC02716	-1.58496	0.0692746	-2.40469e+16	2.40262e-18	31.8227
HT	LIPH	-1.58496	0.0692746	-2.40469e+16	2.40262e-18	31.8227
HT	LRRC39	-1.58496	0.0692746	-2.40469e+16	2.40262e-18	31.8227
HT	LRRC55	-1.58496	0.0692746	-2.40469e+16	2.40262e-18	31.8227
HT	LRRN2	-1.58496	0.0692746	-2.40469e+16	2.40262e-18	31.8227
HT	LY6G5C	-1.58496	0.0692746	-2.40469e+16	2.40262e-18	31.8227
HT	MAGT1	-1.58496	0.0692746	-2.40469e+16	2.40262e-18	31.8227
HT	MAPK12	-1.58496	0.0692746	-2.40469e+16	2.40262e-18	31.8227
HT	MAPK15	-1.58496	0.0692746	-2.40469e+16	2.40262e-18	31.8227
HT	MATN1	-1.58496	0.0692746	-2.40469e+16	2.40262e-18	31.8227
HT	MCIDAS	-1.58496	0.0692746	-2.40469e+16	2.40262e-18	31.8227
HT	MED26	-1.58496	0.0692746	-2.40469e+16	2.40262e-18	31.8227
HT	METTL14-DT	-1.58496	0.0692746	-2.40469e+16	2.40262e-18	31.8227
HT	METTL8	-1.58496	0.0692746	-2.40469e+16	2.40262e-18	31.8227
HT	MGARP	-1.58496	0.0692746	-2.40469e+16	2.40262e-18	31.8227
HT	MIR205HG	-1.58496	0.0692746	-2.40469e+16	2.40262e-18	31.8227
HT	MIR210HG	-1.58496	0.0692746	-2.40469e+16	2.40262e-18	31.8227
HT	MMP23B	-1.58496	0.0692746	-2.40469e+16	2.40262e-18	31.8227
HT	MOB3C	-1.58496	0.0692746	-2.40469e+16	2.40262e-18	31.8227
HT	MORF4L2-AS1	-1.58496	0.0692746	-2.40469e+16	2.40262e-18	31.8227
HT	MPO	-1.58496	0.0692746	-2.40469e+16	2.40262e-18	31.8227
HT	MTA1	-1.58496	0.0692746	-2.40469e+16	2.40262e-18	31.8227
HT	MTCO1P12	-1.58496	0.0692746	-2.40469e+16	2.40262e-18	31.8227
HT	MTSS1	-1.58496	0.0692746	-2.40469e+16	2.40262e-18	31.8227
HT	MUSTN1	-1.58496	0.0692746	-2.40469e+16	2.40262e-18	31.8227
HT	MYOM3	-1.58496	0.0692746	-2.40469e+16	2.40262e-18	31.8227
HT	MYOZ1	-1.58496	0.0692746	-2.40469e+16	2.40262e-18	31.8227
HT	MZF1-AS1	-1.58496	0.0692746	-2.40469e+16	2.40262e-18	31.8227
HT	N4BP2L2-IT2	-1.58496	0.0692746	-2.40469e+16	2.40262e-18	31.8227
HT	NAALADL1	-1.58496	0.0692746	-2.40469e+16	2.40262e-18	31.8227
HT	NCAN	-1.58496	0.0692746	-2.40469e+16	2.40262e-18	31.8227
HT	NCCRP1	-1.58496	0.0692746	-2.40469e+16	2.40262e-18	31.8227
HT	NDUFV2-AS1	-1.58496	0.0692746	-2.40469e+16	2.40262e-18	31.8227
HT	NFAM1	-1.58496	0.0692746	-2.40469e+16	2.40262e-18	31.8227
HT	NFASC	-1.58496	0.0692746	-2.40469e+16	2.40262e-18	31.8227
HT	NHEJ1	-1.58496	0.0692746	-2.40469e+16	2.40262e-18	31.8227
HT	NKAPL	-1.58496	0.0692746	-2.40469e+16	2.40262e-18	31.8227
HT	NKD1	-1.58496	0.0692746	-2.40469e+16	2.40262e-18	31.8227
HT	NNAT	-1.58496	0.0692746	-2.40469e+16	2.40262e-18	31.8227
HT	NOXRED1	-1.58496	0.0692746	-2.40469e+16	2.40262e-18	31.8227
HT	NTM	-1.58496	0.0692746	-2.40469e+16	2.40262e-18	31.8227
HT	OBSCN-AS1	-1.58496	0.0692746	-2.40469e+16	2.40262e-18	31.8227
HT	OXER1	-1.58496	0.0692746	-2.40469e+16	2.40262e-18	31.8227
HT	PARM1-AS1	-1.58496	0.0692746	-2.40469e+16	2.40262e-18	31.8227
HT	PCDHB10	-1.58496	0.0692746	-2.40469e+16	2.40262e-18	31.8227
HT	PCDHB11	-1.58496	0.0692746	-2.40469e+16	2.40262e-18	31.8227
HT	PCDHGA11	-1.58496	0.0692746	-2.40469e+16	2.40262e-18	31.8227
HT	PCDHGA3	-1.58496	0.0692746	-2.40469e+16	2.40262e-18	31.8227
HT	PCDHGA5	-1.58496	0.0692746	-2.40469e+16	2.40262e-18	31.8227
HT	PCDHGA7	-1.58496	0.0692746	-2.40469e+16	2.40262e-18	31.8227
HT	PCP4L1	-1.58496	0.0692746	-2.40469e+16	2.40262e-18	31.8227
HT	PDE1C	-1.58496	0.0692746	-2.40469e+16	2.40262e-18	31.8227
HT	PFN1P2	-1.58496	0.0692746	-2.40469e+16	2.40262e-18	31.8227
HT	PGA5	-1.58496	0.0692746	-2.40469e+16	2.40262e-18	31.8227
HT	PGAM1P8	-1.58496	0.0692746	-2.40469e+16	2.40262e-18	31.8227
HT	PGLYRP1	-1.58496	0.0692746	-2.40469e+16	2.40262e-18	31.8227
HT	PGR	-1.58496	0.0692746	-2.40469e+16	2.40262e-18	31.8227
HT	PIGZ	-1.58496	0.0692746	-2.40469e+16	2.40262e-18	31.8227
HT	PITRM1-AS1	-1.58496	0.0692746	-2.40469e+16	2.40262e-18	31.8227
HT	PKN2-AS1	-1.58496	0.0692746	-2.40469e+16	2.40262e-18	31.8227
HT	PLSCR2	-1.58496	0.0692746	-2.40469e+16	2.40262e-18	31.8227
HT	PLXNB3	-1.58496	0.0692746	-2.40469e+16	2.40262e-18	31.8227
HT	PMS2P3	-1.58496	0.0692746	-2.40469e+16	2.40262e-18	31.8227
HT	POU5F1B	-1.58496	0.0692746	-2.40469e+16	2.40262e-18	31.8227
HT	PPFIA2	-1.58496	0.0692746	-2.40469e+16	2.40262e-18	31.8227
HT	PPM1K-DT	-1.58496	0.0692746	-2.40469e+16	2.40262e-18	31.8227
HT	PPP1R1A	-1.58496	0.0692746	-2.40469e+16	2.40262e-18	31.8227
HT	PPP1R1C	-1.58496	0.0692746	-2.40469e+16	2.40262e-18	31.8227
HT	PPP2R3B	-1.58496	0.0692746	-2.40469e+16	2.40262e-18	31.8227
HT	PPP5D1	-1.58496	0.0692746	-2.40469e+16	2.40262e-18	31.8227
HT	PRCD	-1.58496	0.0692746	-2.40469e+16	2.40262e-18	31.8227
HT	PRLR	-1.58496	0.0692746	-2.40469e+16	2.40262e-18	31.8227
HT	PROK2	-1.58496	0.0692746	-2.40469e+16	2.40262e-18	31.8227
HT	PRPS2	-1.58496	0.0692746	-2.40469e+16	2.40262e-18	31.8227
HT	PRR22	-1.58496	0.0692746	-2.40469e+16	2.40262e-18	31.8227
HT	PRRT1	-1.58496	0.0692746	-2.40469e+16	2.40262e-18	31.8227
HT	PRRT2	-1.58496	0.0692746	-2.40469e+16	2.40262e-18	31.8227
HT	PRSS21	-1.58496	0.0692746	-2.40469e+16	2.40262e-18	31.8227
HT	PSD2	-1.58496	0.0692746	-2.40469e+16	2.40262e-18	31.8227
HT	PTGER3	-1.58496	0.0692746	-2.40469e+16	2.40262e-18	31.8227
HT	RANBP3L	-1.58496	0.0692746	-2.40469e+16	2.40262e-18	31.8227
HT	RASSF10	-1.58496	0.0692746	-2.40469e+16	2.40262e-18	31.8227
HT	RB1-DT	-1.58496	0.0692746	-2.40469e+16	2.40262e-18	31.8227
HT	RBM38	-1.58496	0.0692746	-2.40469e+16	2.40262e-18	31.8227
HT	RET	-1.58496	0.0692746	-2.40469e+16	2.40262e-18	31.8227
HT	RGMA	-1.58496	0.0692746	-2.40469e+16	2.40262e-18	31.8227
HT	RHEX	-1.58496	0.0692746	-2.40469e+16	2.40262e-18	31.8227
HT	RNASEH1P2	-1.58496	0.0692746	-2.40469e+16	2.40262e-18	31.8227
HT	RNASEH2B-AS1	-1.58496	0.0692746	-2.40469e+16	2.40262e-18	31.8227
HT	RPL5P18	-1.58496	0.0692746	-2.40469e+16	2.40262e-18	31.8227
HT	RPS20P22	-1.58496	0.0692746	-2.40469e+16	2.40262e-18	31.8227
HT	RRN3P2	-1.58496	0.0692746	-2.40469e+16	2.40262e-18	31.8227
HT	RSPH14	-1.58496	0.0692746	-2.40469e+16	2.40262e-18	31.8227
HT	RSPH9	-1.58496	0.0692746	-2.40469e+16	2.40262e-18	31.8227
HT	SAMD11	-1.58496	0.0692746	-2.40469e+16	2.40262e-18	31.8227
HT	SEC1P	-1.58496	0.0692746	-2.40469e+16	2.40262e-18	31.8227
HT	SECTM1	-1.58496	0.0692746	-2.40469e+16	2.40262e-18	31.8227
HT	SEMA3F-AS1	-1.58496	0.0692746	-2.40469e+16	2.40262e-18	31.8227
HT	SERHL	-1.58496	0.0692746	-2.40469e+16	2.40262e-18	31.8227
HT	SF3B5	-1.58496	0.0692746	-2.40469e+16	2.40262e-18	31.8227
HT	SH2D5	-1.58496	0.0692746	-2.40469e+16	2.40262e-18	31.8227
HT	SHBG	-1.58496	0.0692746	-2.40469e+16	2.40262e-18	31.8227
HT	SIAH2	-1.58496	0.0692746	-2.40469e+16	2.40262e-18	31.8227
HT	SIPA1L1	-1.58496	0.0692746	-2.40469e+16	2.40262e-18	31.8227
HT	SKI	-1.58496	0.0692746	-2.40469e+16	2.40262e-18	31.8227
HT	SLC23A3	-1.58496	0.0692746	-2.40469e+16	2.40262e-18	31.8227
HT	SLC24A2	-1.58496	0.0692746	-2.40469e+16	2.40262e-18	31.8227
HT	SLC44A3-AS1	-1.58496	0.0692746	-2.40469e+16	2.40262e-18	31.8227
HT	SLC45A1	-1.58496	0.0692746	-2.40469e+16	2.40262e-18	31.8227
HT	SLC52A1	-1.58496	0.0692746	-2.40469e+16	2.40262e-18	31.8227
HT	SLC6A16	-1.58496	0.0692746	-2.40469e+16	2.40262e-18	31.8227
HT	SLC7A14-AS1	-1.58496	0.0692746	-2.40469e+16	2.40262e-18	31.8227
HT	SLC7A4	-1.58496	0.0692746	-2.40469e+16	2.40262e-18	31.8227
HT	SLC9A5	-1.58496	0.0692746	-2.40469e+16	2.40262e-18	31.8227
HT	SLITRK2	-1.58496	0.0692746	-2.40469e+16	2.40262e-18	31.8227
HT	SLX1B	-1.58496	0.0692746	-2.40469e+16	2.40262e-18	31.8227
HT	SMIM1	-1.58496	0.0692746	-2.40469e+16	2.40262e-18	31.8227
HT	SMIM3	-1.58496	0.0692746	-2.40469e+16	2.40262e-18	31.8227
HT	SMTN	-1.58496	0.0692746	-2.40469e+16	2.40262e-18	31.8227
HT	SNHG31	-1.58496	0.0692746	-2.40469e+16	2.40262e-18	31.8227
HT	SPIN4	-1.58496	0.0692746	-2.40469e+16	2.40262e-18	31.8227
HT	SPSB1	-1.58496	0.0692746	-2.40469e+16	2.40262e-18	31.8227
HT	SRGAP2	-1.58496	0.0692746	-2.40469e+16	2.40262e-18	31.8227
HT	ST20	-1.58496	0.0692746	-2.40469e+16	2.40262e-18	31.8227
HT	STEAP4	-1.58496	0.0692746	-2.40469e+16	2.40262e-18	31.8227
HT	STX16-NPEPL1	-1.58496	0.0692746	-2.40469e+16	2.40262e-18	31.8227
HT	STX1A	-1.58496	0.0692746	-2.40469e+16	2.40262e-18	31.8227
HT	SYPL2	-1.58496	0.0692746	-2.40469e+16	2.40262e-18	31.8227
HT	SYT7	-1.58496	0.0692746	-2.40469e+16	2.40262e-18	31.8227
HT	TACR1	-1.58496	0.0692746	-2.40469e+16	2.40262e-18	31.8227
HT	TACR3	-1.58496	0.0692746	-2.40469e+16	2.40262e-18	31.8227
HT	TAFA1	-1.58496	0.0692746	-2.40469e+16	2.40262e-18	31.8227
HT	TAS2R4	-1.58496	0.0692746	-2.40469e+16	2.40262e-18	31.8227
HT	TCTEX1D1	-1.58496	0.0692746	-2.40469e+16	2.40262e-18	31.8227
HT	TDGF1P3	-1.58496	0.0692746	-2.40469e+16	2.40262e-18	31.8227
HT	TDRD12	-1.58496	0.0692746	-2.40469e+16	2.40262e-18	31.8227
HT	TENM3-AS1	-1.58496	0.0692746	-2.40469e+16	2.40262e-18	31.8227
HT	TEPSIN	-1.58496	0.0692746	-2.40469e+16	2.40262e-18	31.8227
HT	TESC	-1.58496	0.0692746	-2.40469e+16	2.40262e-18	31.8227
HT	TEX41	-1.58496	0.0692746	-2.40469e+16	2.40262e-18	31.8227
HT	TIGD4	-1.58496	0.0692746	-2.40469e+16	2.40262e-18	31.8227
HT	TIPARP-AS1	-1.58496	0.0692746	-2.40469e+16	2.40262e-18	31.8227
HT	TLL2	-1.58496	0.0692746	-2.40469e+16	2.40262e-18	31.8227
HT	TM4SF1-AS1	-1.58496	0.0692746	-2.40469e+16	2.40262e-18	31.8227
HT	TMEM232	-1.58496	0.0692746	-2.40469e+16	2.40262e-18	31.8227
HT	TMEM253	-1.58496	0.0692746	-2.40469e+16	2.40262e-18	31.8227
HT	TMIGD3	-1.58496	0.0692746	-2.40469e+16	2.40262e-18	31.8227
HT	TMPRSS7	-1.58496	0.0692746	-2.40469e+16	2.40262e-18	31.8227
HT	TNFRSF14	-1.58496	0.0692746	-2.40469e+16	2.40262e-18	31.8227
HT	TP53I11	-1.58496	0.0692746	-2.40469e+16	2.40262e-18	31.8227
HT	TP53TG3B	-1.58496	0.0692746	-2.40469e+16	2.40262e-18	31.8227
HT	TP53TG3E	-1.58496	0.0692746	-2.40469e+16	2.40262e-18	31.8227
HT	TRABD2B	-1.58496	0.0692746	-2.40469e+16	2.40262e-18	31.8227
HT	TRAF3IP2-AS1	-1.58496	0.0692746	-2.40469e+16	2.40262e-18	31.8227
HT	TRIL	-1.58496	0.0692746	-2.40469e+16	2.40262e-18	31.8227
HT	TRNP1	-1.58496	0.0692746	-2.40469e+16	2.40262e-18	31.8227
HT	TSKS	-1.58496	0.0692746	-2.40469e+16	2.40262e-18	31.8227
HT	TSPEAR	-1.58496	0.0692746	-2.40469e+16	2.40262e-18	31.8227
HT	TXK	-1.58496	0.0692746	-2.40469e+16	2.40262e-18	31.8227
HT	TYMSOS	-1.58496	0.0692746	-2.40469e+16	2.40262e-18	31.8227
HT	UGT1A4	-1.58496	0.0692746	-2.40469e+16	2.40262e-18	31.8227
HT	UMAD1	-1.58496	0.0692746	-2.40469e+16	2.40262e-18	31.8227
HT	UNC13C	-1.58496	0.0692746	-2.40469e+16	2.40262e-18	31.8227
HT	UNC5D	-1.58496	0.0692746	-2.40469e+16	2.40262e-18	31.8227
HT	UOX	-1.58496	0.0692746	-2.40469e+16	2.40262e-18	31.8227
HT	UPB1	-1.58496	0.0692746	-2.40469e+16	2.40262e-18	31.8227
HT	UQCRHL	-1.58496	0.0692746	-2.40469e+16	2.40262e-18	31.8227
HT	USP32P3	-1.58496	0.0692746	-2.40469e+16	2.40262e-18	31.8227
HT	UVRAG-DT	-1.58496	0.0692746	-2.40469e+16	2.40262e-18	31.8227
HT	VPS33B-DT	-1.58496	0.0692746	-2.40469e+16	2.40262e-18	31.8227
HT	VPS9D1	-1.58496	0.0692746	-2.40469e+16	2.40262e-18	31.8227
HT	VSTM2L	-1.58496	0.0692746	-2.40469e+16	2.40262e-18	31.8227
HT	VSTM5	-1.58496	0.0692746	-2.40469e+16	2.40262e-18	31.8227
HT	VWA7	-1.58496	0.0692746	-2.40469e+16	2.40262e-18	31.8227
HT	WDR17	-1.58496	0.0692746	-2.40469e+16	2.40262e-18	31.8227
HT	WFIKKN2	-1.58496	0.0692746	-2.40469e+16	2.40262e-18	31.8227
HT	WNT10B	-1.58496	0.0692746	-2.40469e+16	2.40262e-18	31.8227
HT	WNT16	-1.58496	0.0692746	-2.40469e+16	2.40262e-18	31.8227
HT	Z93930.2	-1.58496	0.0692746	-2.40469e+16	2.40262e-18	31.8227
HT	Z98257.1	-1.58496	0.0692746	-2.40469e+16	2.40262e-18	31.8227
HT	Z99774.1	-1.58496	0.0692746	-2.40469e+16	2.40262e-18	31.8227
HT	ZBED9	-1.58496	0.0692746	-2.40469e+16	2.40262e-18	31.8227
HT	ZBTB12	-1.58496	0.0692746	-2.40469e+16	2.40262e-18	31.8227
HT	ZMYND19	-1.58496	0.0692746	-2.40469e+16	2.40262e-18	31.8227
HT	ZNF209P	-1.58496	0.0692746	-2.40469e+16	2.40262e-18	31.8227
HT	ZNF367	-1.58496	0.0692746	-2.40469e+16	2.40262e-18	31.8227
HT	ZNF444	-1.58496	0.0692746	-2.40469e+16	2.40262e-18	31.8227
HT	ZNF451-AS1	-1.58496	0.0692746	-2.40469e+16	2.40262e-18	31.8227
HT	ZNF460-AS1	-1.58496	0.0692746	-2.40469e+16	2.40262e-18	31.8227
HT	ZNF467	-1.58496	0.0692746	-2.40469e+16	2.40262e-18	31.8227
HT	ZNF48	-1.58496	0.0692746	-2.40469e+16	2.40262e-18	31.8227
HT	ZNF536	-1.58496	0.0692746	-2.40469e+16	2.40262e-18	31.8227
HT	ZNF672	-1.58496	0.0692746	-2.40469e+16	2.40262e-18	31.8227
HT	ZSWIM1	-1.58496	0.0692746	-2.40469e+16	2.40262e-18	31.8227
HT	A1BG-AS1	1.58496	0.597595	6011740087573760	1.05018e-17	28.962
HT	ABCB4	1.58496	0.597595	6011740087573760	1.05018e-17	28.962
HT	AC004918.1	1.58496	0.597595	6011740087573760	1.05018e-17	28.962
HT	AC010615.2	1.58496	0.597595	6011740087573760	1.05018e-17	28.962
HT	AC011484.1	1.58496	0.597595	6011740087573760	1.05018e-17	28.962
HT	AC013275.1	1.58496	0.597595	6011740087573760	1.05018e-17	28.962
HT	AC013643.2	1.58496	0.597595	6011740087573760	1.05018e-17	28.962
HT	AC016394.2	1.58496	0.597595	6011740087573760	1.05018e-17	28.962
HT	AC018647.1	1.58496	0.597595	6011740087573760	1.05018e-17	28.962
HT	AC021683.5	1.58496	0.597595	6011740087573760	1.05018e-17	28.962
HT	AC023908.3	1.58496	0.597595	6011740087573760	1.05018e-17	28.962
HT	AC027644.3	1.58496	0.597595	6011740087573760	1.05018e-17	28.962
HT	AC046185.3	1.58496	0.597595	6011740087573760	1.05018e-17	28.962
HT	AC062037.4	1.58496	0.597595	6011740087573760	1.05018e-17	28.962
HT	AC092645.2	1.58496	0.597595	6011740087573760	1.05018e-17	28.962
HT	AC102953.2	1.58496	0.597595	6011740087573760	1.05018e-17	28.962
HT	AC108215.1	1.58496	0.597595	6011740087573760	1.05018e-17	28.962
HT	AC124248.1	1.58496	0.597595	6011740087573760	1.05018e-17	28.962
HT	AC211476.12	1.58496	0.597595	6011740087573760	1.05018e-17	28.962
HT	AC239868.1	1.58496	0.597595	6011740087573760	1.05018e-17	28.962
HT	ADIG	1.58496	0.597595	6011740087573760	1.05018e-17	28.962
HT	AL022476.1	1.58496	0.597595	6011740087573760	1.05018e-17	28.962
HT	AL118558.4	1.58496	0.597595	6011740087573760	1.05018e-17	28.962
HT	AL133352.1	1.58496	0.597595	6011740087573760	1.05018e-17	28.962
HT	AL137026.1	1.58496	0.597595	6011740087573760	1.05018e-17	28.962
HT	AL139220.2	1.58496	0.597595	6011740087573760	1.05018e-17	28.962
HT	AL157392.3	1.58496	0.597595	6011740087573760	1.05018e-17	28.962
HT	AL353743.2	1.58496	0.597595	6011740087573760	1.05018e-17	28.962
HT	AL358472.5	1.58496	0.597595	6011740087573760	1.05018e-17	28.962
HT	AL391807.1	1.58496	0.597595	6011740087573760	1.05018e-17	28.962
HT	AL451165.2	1.58496	0.597595	6011740087573760	1.05018e-17	28.962
HT	AL513318.2	1.58496	0.597595	6011740087573760	1.05018e-17	28.962
HT	AL670729.3	1.58496	0.597595	6011740087573760	1.05018e-17	28.962
HT	AL691447.2	1.58496	0.597595	6011740087573760	1.05018e-17	28.962
HT	AL928654.4	1.58496	0.597595	6011740087573760	1.05018e-17	28.962
HT	AMPD1	1.58496	0.597595	6011740087573760	1.05018e-17	28.962
HT	AP005329.2	1.58496	0.597595	6011740087573760	1.05018e-17	28.962
HT	AP006623.1	1.58496	0.597595	6011740087573760	1.05018e-17	28.962
HT	ARHGEF4	1.58496	0.597595	6011740087573760	1.05018e-17	28.962
HT	ARMC5	1.58496	0.597595	6011740087573760	1.05018e-17	28.962
HT	ARNTL2	1.58496	0.597595	6011740087573760	1.05018e-17	28.962
HT	ASPHD2	1.58496	0.597595	6011740087573760	1.05018e-17	28.962
HT	B3GNT8	1.58496	0.597595	6011740087573760	1.05018e-17	28.962
HT	BVES	1.58496	0.597595	6011740087573760	1.05018e-17	28.962
HT	C17orf58	1.58496	0.597595	6011740087573760	1.05018e-17	28.962
HT	C1QTNF6	1.58496	0.597595	6011740087573760	1.05018e-17	28.962
HT	C2orf50	1.58496	0.597595	6011740087573760	1.05018e-17	28.962
HT	C5orf38	1.58496	0.597595	6011740087573760	1.05018e-17	28.962
HT	CCDC183	1.58496	0.597595	6011740087573760	1.05018e-17	28.962
HT	CCDC189	1.58496	0.597595	6011740087573760	1.05018e-17	28.962
HT	CDC34	1.58496	0.597595	6011740087573760	1.05018e-17	28.962
HT	CDKL3	1.58496	0.597595	6011740087573760	1.05018e-17	28.962
HT	CDKN2B	1.58496	0.597595	6011740087573760	1.05018e-17	28.962
HT	CDYL2	1.58496	0.597595	6011740087573760	1.05018e-17	28.962
HT	CEACAM19	1.58496	0.597595	6011740087573760	1.05018e-17	28.962
HT	CEACAM4	1.58496	0.597595	6011740087573760	1.05018e-17	28.962
HT	CH25H	1.58496	0.597595	6011740087573760	1.05018e-17	28.962
HT	CLDN3	1.58496	0.597595	6011740087573760	1.05018e-17	28.962
HT	CLEC11A	1.58496	0.597595	6011740087573760	1.05018e-17	28.962
HT	CLEC4F	1.58496	0.597595	6011740087573760	1.05018e-17	28.962
HT	COL11A2	1.58496	0.597595	6011740087573760	1.05018e-17	28.962
HT	COQ8B	1.58496	0.597595	6011740087573760	1.05018e-17	28.962
HT	CYP26B1	1.58496	0.597595	6011740087573760	1.05018e-17	28.962
HT	CYP2S1	1.58496	0.597595	6011740087573760	1.05018e-17	28.962
HT	DEPDC4	1.58496	0.597595	6011740087573760	1.05018e-17	28.962
HT	DGKG	1.58496	0.597595	6011740087573760	1.05018e-17	28.962
HT	DOK1	1.58496	0.597595	6011740087573760	1.05018e-17	28.962
HT	DYNC1I1	1.58496	0.597595	6011740087573760	1.05018e-17	28.962
HT	EFNA3	1.58496	0.597595	6011740087573760	1.05018e-17	28.962
HT	ENOX1	1.58496	0.597595	6011740087573760	1.05018e-17	28.962
HT	ERVMER34-1	1.58496	0.597595	6011740087573760	1.05018e-17	28.962
HT	FAM124A	1.58496	0.597595	6011740087573760	1.05018e-17	28.962
HT	FAM30A	1.58496	0.597595	6011740087573760	1.05018e-17	28.962
HT	FASLG	1.58496	0.597595	6011740087573760	1.05018e-17	28.962
HT	FBXL14	1.58496	0.597595	6011740087573760	1.05018e-17	28.962
HT	FBXO24	1.58496	0.597595	6011740087573760	1.05018e-17	28.962
HT	FSIP1	1.58496	0.597595	6011740087573760	1.05018e-17	28.962
HT	GCOM1	1.58496	0.597595	6011740087573760	1.05018e-17	28.962
HT	GPC5	1.58496	0.597595	6011740087573760	1.05018e-17	28.962
HT	GRASP	1.58496	0.597595	6011740087573760	1.05018e-17	28.962
HT	HMGCS2	1.58496	0.597595	6011740087573760	1.05018e-17	28.962
HT	HOXD9	1.58496	0.597595	6011740087573760	1.05018e-17	28.962
HT	HS6ST3	1.58496	0.597595	6011740087573760	1.05018e-17	28.962
HT	IGLC2	1.58496	0.597595	6011740087573760	1.05018e-17	28.962
HT	IGLV1-47	1.58496	0.597595	6011740087573760	1.05018e-17	28.962
HT	IKBKG	1.58496	0.597595	6011740087573760	1.05018e-17	28.962
HT	IL18RAP	1.58496	0.597595	6011740087573760	1.05018e-17	28.962
HT	ITGA11	1.58496	0.597595	6011740087573760	1.05018e-17	28.962
HT	ITPKC	1.58496	0.597595	6011740087573760	1.05018e-17	28.962
HT	KIF18B	1.58496	0.597595	6011740087573760	1.05018e-17	28.962
HT	KIR3DL2	1.58496	0.597595	6011740087573760	1.05018e-17	28.962
HT	KLF2	1.58496	0.597595	6011740087573760	1.05018e-17	28.962
HT	KNDC1	1.58496	0.597595	6011740087573760	1.05018e-17	28.962
HT	LACTB2-AS1	1.58496	0.597595	6011740087573760	1.05018e-17	28.962
HT	LINC00641	1.58496	0.597595	6011740087573760	1.05018e-17	28.962
HT	LINC01515	1.58496	0.597595	6011740087573760	1.05018e-17	28.962
HT	LINC01571	1.58496	0.597595	6011740087573760	1.05018e-17	28.962
HT	LINC02018	1.58496	0.597595	6011740087573760	1.05018e-17	28.962
HT	LINC02328	1.58496	0.597595	6011740087573760	1.05018e-17	28.962
HT	LINC02618	1.58496	0.597595	6011740087573760	1.05018e-17	28.962
HT	LIPE	1.58496	0.597595	6011740087573760	1.05018e-17	28.962
HT	MARS2	1.58496	0.597595	6011740087573760	1.05018e-17	28.962
HT	MEX3C	1.58496	0.597595	6011740087573760	1.05018e-17	28.962
HT	MPIG6B	1.58496	0.597595	6011740087573760	1.05018e-17	28.962
HT	MRPL34	1.58496	0.597595	6011740087573760	1.05018e-17	28.962
HT	MTBP	1.58496	0.597595	6011740087573760	1.05018e-17	28.962
HT	MYL3	1.58496	0.597595	6011740087573760	1.05018e-17	28.962
HT	MYOM2	1.58496	0.597595	6011740087573760	1.05018e-17	28.962
HT	NACC2	1.58496	0.597595	6011740087573760	1.05018e-17	28.962
HT	NIBAN3	1.58496	0.597595	6011740087573760	1.05018e-17	28.962
HT	NLRP4	1.58496	0.597595	6011740087573760	1.05018e-17	28.962
HT	NOD2	1.58496	0.597595	6011740087573760	1.05018e-17	28.962
HT	NRXN1	1.58496	0.597595	6011740087573760	1.05018e-17	28.962
HT	NTF3	1.58496	0.597595	6011740087573760	1.05018e-17	28.962
HT	OPRK1	1.58496	0.597595	6011740087573760	1.05018e-17	28.962
HT	P2RY6	1.58496	0.597595	6011740087573760	1.05018e-17	28.962
HT	PADI4	1.58496	0.597595	6011740087573760	1.05018e-17	28.962
HT	PAQR5	1.58496	0.597595	6011740087573760	1.05018e-17	28.962
HT	PAQR6	1.58496	0.597595	6011740087573760	1.05018e-17	28.962
HT	PDE3B	1.58496	0.597595	6011740087573760	1.05018e-17	28.962
HT	PLK3	1.58496	0.597595	6011740087573760	1.05018e-17	28.962
HT	POMK	1.58496	0.597595	6011740087573760	1.05018e-17	28.962
HT	PXMP2	1.58496	0.597595	6011740087573760	1.05018e-17	28.962
HT	RAB15	1.58496	0.597595	6011740087573760	1.05018e-17	28.962
HT	RASAL3	1.58496	0.597595	6011740087573760	1.05018e-17	28.962
HT	RBFADN	1.58496	0.597595	6011740087573760	1.05018e-17	28.962
HT	RECQL4	1.58496	0.597595	6011740087573760	1.05018e-17	28.962
HT	REPIN1	1.58496	0.597595	6011740087573760	1.05018e-17	28.962
HT	RHCE	1.58496	0.597595	6011740087573760	1.05018e-17	28.962
HT	RNF166	1.58496	0.597595	6011740087573760	1.05018e-17	28.962
HT	RPS6KA4	1.58496	0.597595	6011740087573760	1.05018e-17	28.962
HT	RUFY4	1.58496	0.597595	6011740087573760	1.05018e-17	28.962
HT	SAP30	1.58496	0.597595	6011740087573760	1.05018e-17	28.962
HT	SCNN1D	1.58496	0.597595	6011740087573760	1.05018e-17	28.962
HT	SCOC-AS1	1.58496	0.597595	6011740087573760	1.05018e-17	28.962
HT	SEC16B	1.58496	0.597595	6011740087573760	1.05018e-17	28.962
HT	SIGLEC8	1.58496	0.597595	6011740087573760	1.05018e-17	28.962
HT	SLC13A4	1.58496	0.597595	6011740087573760	1.05018e-17	28.962
HT	SLC22A18AS	1.58496	0.597595	6011740087573760	1.05018e-17	28.962
HT	SPACA6	1.58496	0.597595	6011740087573760	1.05018e-17	28.962
HT	SPAG17	1.58496	0.597595	6011740087573760	1.05018e-17	28.962
HT	SREBF1	1.58496	0.597595	6011740087573760	1.05018e-17	28.962
HT	TBX5	1.58496	0.597595	6011740087573760	1.05018e-17	28.962
HT	TECTB	1.58496	0.597595	6011740087573760	1.05018e-17	28.962
HT	TEDC2	1.58496	0.597595	6011740087573760	1.05018e-17	28.962
HT	TIRAP	1.58496	0.597595	6011740087573760	1.05018e-17	28.962
HT	TLR8	1.58496	0.597595	6011740087573760	1.05018e-17	28.962
HT	TMEM184A	1.58496	0.597595	6011740087573760	1.05018e-17	28.962
HT	TMPPE	1.58496	0.597595	6011740087573760	1.05018e-17	28.962
HT	TRIM62	1.58496	0.597595	6011740087573760	1.05018e-17	28.962
HT	TSPAN11	1.58496	0.597595	6011740087573760	1.05018e-17	28.962
HT	UNC93B1	1.58496	0.597595	6011740087573760	1.05018e-17	28.962
HT	WARS2-AS1	1.58496	0.597595	6011740087573760	1.05018e-17	28.962
HT	WIZ	1.58496	0.597595	6011740087573760	1.05018e-17	28.962
HT	XYLB	1.58496	0.597595	6011740087573760	1.05018e-17	28.962
HT	ZGLP1	1.58496	0.597595	6011740087573760	1.05018e-17	28.962
HT	ZNF263	1.58496	0.597595	6011740087573760	1.05018e-17	28.962
HT	ZNF423	1.58496	0.597595	6011740087573760	1.05018e-17	28.962
HT	ZNF668	1.58496	0.597595	6011740087573760	1.05018e-17	28.962
HT	ZNF697	1.58496	0.597595	6011740087573760	1.05018e-17	28.962
HT	ZNF80	1.58496	0.597595	6011740087573760	1.05018e-17	28.962
HT	ARL11	1.57993	3.76417	1498167785635160	4.60589e-17	26.0942
HT	EDN1	-1.57973	3.45117	-52.5727	0.00952618	-37.8492
HT	GTF2IP12	-1.57973	3.45117	-52.5727	0.00952618	-37.8492
HT	COQ2	1.54367	2.892	2927563949215310	2.25815e-17	27.4769
HT	MICAL2	1.54367	2.892	2927563949215310	2.25815e-17	27.4769
HT	NEMP1	1.54367	2.892	2927563949215310	2.25815e-17	27.4769
HT	C12orf60	1.54311	3.37705	11.9537	0.045945	-40.8991
HT	IL1B	1.54311	3.37705	11.9537	0.045945	-40.8991
HT	AC079594.2	1.53685	2.88745	11.1095	0.0496477	-41.049
HT	UBE2T	1.53552	3.96617	13.9923	0.0388854	-40.5761
HT	TRAF3	1.53216	4.67793	31.5403	0.0164023	-38.9031
HT	ARHGAP25	1.52446	4.9732	12.8162	0.0426772	-40.7563
HT	LMNA	1.51514	5.89936	1710.54	0.000234337	-30.6621
HT	LBR	1.50289	5.65285	16.9868	0.0316553	-40.1776
HT	PLAUR	1.4998	4.21234	14.5192	0.0373911	-40.5002
HT	CD84	1.48976	4.95006	11.9848	0.0458188	-40.8937
HT	KLHL23	-1.48516	3.08457	-18.1075	0.0295797	-40.0462
HT	PRKAA2	-1.48516	3.08457	-18.1075	0.0295797	-40.0462
HT	ZNF398	-1.48516	3.08457	-18.1075	0.0295797	-40.0462
HT	ARHGAP4	1.4636	2.10165	17.8447	0.0300424	-40.0763
HT	DGAT1	1.4636	2.10165	17.8447	0.0300424	-40.0763
HT	EBPL	1.4636	2.10165	17.8447	0.0300424	-40.0763
HT	MYO7A	1.4636	2.10165	17.8447	0.0300424	-40.0763
HT	ORAI3	1.4636	2.10165	17.8447	0.0300424	-40.0763
HT	PALM3	1.4636	2.10165	17.8447	0.0300424	-40.0763
HT	RAB32	1.4636	2.10165	17.8447	0.0300424	-40.0763
HT	SEMA4C	1.4636	2.10165	17.8447	0.0300424	-40.0763
HT	VNN1	1.4636	2.10165	17.8447	0.0300424	-40.0763
HT	HMOX1	1.46012	4.18589	39.8037	0.0128068	-38.4232
HT	LINC00174	-1.45773	3.6791	-1382288242437560	5.01778e-17	25.9281
HT	AC013717.1	-1.44357	1.61072	-238.189	0.00190911	-34.7312
HT	STX12	-1.44237	8.30758	-186.204	0.00248087	-35.2394
HT	ANKRD44	1.4312	4.41383	20.3098	0.0261855	-39.81
HT	CEP41	1.4158	3.54454	14.4627	0.0375459	-40.5082
HT	CFB	1.41317	5.87498	32.1519	0.0160707	-38.8635
HT	RAB8B	1.40039	5.00827	83.8143	0.00580012	-36.8868
HT	IFIT3	1.39874	5.54892	71.5222	0.00686613	-37.2141
HT	SYT17	-1.39843	4.47905	-18.6716	0.0286318	-39.9831
HT	KIF17	1.39625	2.05675	44.9206	0.0112611	-38.1738
HT	MCM6	1.39579	4.39022	126.736	0.00373575	-36.0335
HT	ZNF595	-1.39557	3.87175	-2646695881308640	2.51395e-17	27.2688
HT	FAM126A	1.38791	3.86775	16.3411	0.0329843	-40.2573
HT	TDRD3	1.37118	3.09078	21.9195	0.0241475	-39.653
HT	EEF1AKMT3	1.36757	4.12419	11.5188	0.0477832	-40.975
HT	STAT5B	1.36757	4.12419	11.5188	0.0477832	-40.975
HT	LINC00205	-1.36737	3.04531	-16.6714	0.0322913	-40.2162
HT	KLRD1	-1.36622	3.38	-45.4673	0.0111172	-38.1488
HT	AL050309.1	-1.34959	2.31275	-8.19975e+18	4.85169e-21	39.4063
HT	C3orf14	-1.34959	2.31275	-8.19975e+18	4.85169e-21	39.4063
HT	PSTPIP2	-1.34959	2.31275	-8.19975e+18	4.85169e-21	39.4063
HT	SLC25A21-AS1	-1.34959	2.31275	-8.19975e+18	4.85169e-21	39.4063
HT	ZNF416	-1.34959	2.31275	-8.19975e+18	4.85169e-21	39.4063
HT	C11orf24	1.34833	3.84137	1278548854162380	5.45206e-17	25.767
HT	MX2	1.34154	3.83684	117.588	0.00404573	-36.1881
HT	BX664615.2	-1.32141	4.44468	-12.4562	0.0439849	-40.8147
HT	GPKOW	1.31638	4.53407	19.5956	0.0272002	-39.8837
HT	IL11RA	-1.3027	4.6691	-13.8662	0.0392605	-40.5947
HT	GPER1	1.29539	3.2119	60.3264	0.00822931	-37.5654
HT	HAVCR2	1.29238	3.80407	13.7563	0.039593	-40.611
HT	TBX3	-1.29154	5.3617	-11.1246	0.0495766	-41.0463
HT	UBR5-AS1	-1.2676	4.6574	-13.4925	0.0404139	-40.6508
HT	TSC22D2	-1.25433	3.3427	-41.7434	0.0121749	-38.3251
HT	SNCA	-1.25335	5.49412	-43.1509	0.011753	-38.2567
HT	FCGR2B	1.24662	5.93049	28.3625	0.0183627	-39.122
HT	BCL2A1	1.24379	3.54007	54.3322	0.00919837	-37.7813
HT	ADA	1.23643	3.76677	7.51222e+18	5.32548e-21	39.4036
HT	CAVIN3	1.23643	3.76677	7.51222e+18	5.32548e-21	39.4036
HT	MGAT4A	1.23244	4.63617	15.7317	0.0343417	-40.3355
HT	SP4	-1.22703	4.93536	-42.9565	0.0118096	-38.266
HT	AC112220.2	-1.22502	2.99786	-14.9359	0.0362857	-40.4421
HT	CDR2	-1.22502	2.99786	-14.9359	0.0362857	-40.4421
HT	CES4A	-1.22502	2.99786	-14.9359	0.0362857	-40.4421
HT	COL21A1	-1.22502	2.99786	-14.9359	0.0362857	-40.4421
HT	CXCL3	-1.22502	2.99786	-14.9359	0.0362857	-40.4421
HT	EEF2K	-1.22502	2.99786	-14.9359	0.0362857	-40.4421
HT	PRXL2C	-1.22502	2.99786	-14.9359	0.0362857	-40.4421
HT	AC012645.1	-1.22239	1.53338	-4636516964124420	1.38449e-17	28.4259
HT	AGAP11	-1.22239	1.53338	-4636516964124420	1.38449e-17	28.4259
HT	ANKRD35	-1.22239	1.53338	-4636516964124420	1.38449e-17	28.4259
HT	CFAP54	-1.22239	1.53338	-4636516964124420	1.38449e-17	28.4259
HT	CRTC1	-1.22239	1.53338	-4636516964124420	1.38449e-17	28.4259
HT	GNB1L	-1.22239	1.53338	-4636516964124420	1.38449e-17	28.4259
HT	KDM4D	-1.22239	1.53338	-4636516964124420	1.38449e-17	28.4259
HT	LINC01409	-1.22239	1.53338	-4636516964124420	1.38449e-17	28.4259
HT	LMCD1-AS1	-1.22239	1.53338	-4636516964124420	1.38449e-17	28.4259
HT	NPY5R	-1.22239	1.53338	-4636516964124420	1.38449e-17	28.4259
HT	PCDHB13	-1.22239	1.53338	-4636516964124420	1.38449e-17	28.4259
HT	SLC24A3	-1.22239	1.53338	-4636516964124420	1.38449e-17	28.4259
HT	TCIM	-1.22239	1.53338	-4636516964124420	1.38449e-17	28.4259
HT	TMEM79	-1.22239	1.53338	-4636516964124420	1.38449e-17	28.4259
HT	TPM3P9	-1.22239	1.53338	-4636516964124420	1.38449e-17	28.4259
HT	ZNF284	-1.22239	1.53338	-4636516964124420	1.38449e-17	28.4259
HT	ZNF443	-1.22239	1.53338	-4636516964124420	1.38449e-17	28.4259
HT	ZNF491	-1.22239	1.53338	-4636516964124420	1.38449e-17	28.4259
HT	ZNF513	-1.22239	1.53338	-4636516964124420	1.38449e-17	28.4259
HT	ZRANB2-AS2	-1.22239	1.53338	-4636516964124420	1.38449e-17	28.4259
HT	ZFYVE1	-1.22127	4.22337	-418.971	0.00104684	-33.5656
HT	SH2B3	1.21052	5.09783	19.9028	0.0267545	-39.8517
HT	CEP135	1.20363	4.01489	207.853	0.0022069	-35.0124
HT	IFI27L2	1.20363	4.01489	207.853	0.0022069	-35.0124
HT	ICAM1	1.20125	4.87551	260.703	0.0017342	-34.5448
HT	CLASP2	-1.18412	3.5014	-81.6457	0.00596416	-36.9409
HT	SUCNR1	1.17267	4.73867	23.1562	0.0227797	-39.5399
HT	CD274	1.16865	3.48998	11.3149	0.0486946	-41.0115
HT	GBA2	1.16865	3.48998	11.3149	0.0486946	-41.0115
HT	CIDEB	1.16824	1.90474	35.0036	0.0146823	-38.6883
HT	NSF	1.16306	6.23419	14.1804	0.0383389	-40.5487
HT	EI24	-1.15498	4.5032	-11.3308	0.0486223	-41.0087
HT	PIGA	-1.15009	3.30795	-38.2744	0.0133517	-38.504
HT	PYROXD2	-1.15009	3.30795	-38.2744	0.0133517	-38.504
HT	RFTN2	-1.15009	3.30795	-38.2744	0.0133517	-38.504
HT	SNTB1	-1.14682	4.39518	-15.3121	0.0353407	-40.391
HT	ZNF839	1.13827	1.88476	67.1541	0.00734222	-37.3442
HT	PHOSPHO2	-1.12052	4.66432	-1062525856846230	6.63868e-17	25.385
HT	TNFRSF25	1.11993	4.8213	29.0327	0.0179124	-39.0739
HT	CSF1R	1.11832	4.56009	1060441049358550	6.65256e-17	25.381
HT	MED9	-1.11658	4.18847	-383.057	0.00115157	-33.7506
HT	CSGALNACT2	1.1054	3.44781	379.222	0.00116396	-33.7714
HT	ZNF490	1.1054	3.44781	379.222	0.00116396	-33.7714
HT	NUP188	1.09925	4.68972	15.1309	0.0357898	-40.4155
HT	PDCD7	-1.09777	3.77248	-2081906224167010	3.24541e-17	26.7733
HT	LINC02762	-1.09762	3.55907	-1040816033279670	6.78611e-17	25.3424
HT	PARP6	-1.09762	3.55907	-1040816033279670	6.78611e-17	25.3424
HT	CASP8	1.08924	5.58821	57.3145	0.00869009	-37.6711
HT	KIAA0586	-1.08445	4.64331	-71.8648	0.00683132	-37.2043
HT	CDKN1C	-1.08399	1.48724	-4111540244246740	1.57332e-17	28.1779
HT	AC005076.2	-1.0796	2.22275	-6.55937e+18	6.15225e-21	39.3985
HT	CCDC163	-1.0796	2.22275	-6.55937e+18	6.15225e-21	39.3985
HT	HSPB2	-1.0796	2.22275	-6.55937e+18	6.15225e-21	39.3985
HT	POMC	-1.0796	2.22275	-6.55937e+18	6.15225e-21	39.3985
HT	RFNG	-1.0796	2.22275	-6.55937e+18	6.15225e-21	39.3985
HT	ST20-AS1	-1.0796	2.22275	-6.55937e+18	6.15225e-21	39.3985
HT	ZNF300	-1.0796	2.22275	-6.55937e+18	6.15225e-21	39.3985
HT	AKAP13	-1.07705	7.08717	-17.4115	0.0308364	-40.1269
HT	IQCE	1.07042	3.6561	14.2921	0.0380214	-40.5326
HT	HLA-E	1.06939	10.4473	19.5623	0.0272494	-39.8872
HT	AACS	-1.06697	2.94518	-13.0088	0.042008	-40.7257
HT	AL035530.2	-1.06697	2.94518	-13.0088	0.042008	-40.7257
HT	GRB10	-1.06697	2.94518	-13.0088	0.042008	-40.7257
HT	S100A2	-1.06697	2.94518	-13.0088	0.042008	-40.7257
HT	ZNF687	-1.06697	2.94518	-13.0088	0.042008	-40.7257
HT	AP000866.1	1.06171	2.57069	35.3331	0.0145367	-38.6689
HT	CD226	1.06171	2.57069	35.3331	0.0145367	-38.6689
HT	CYP2U1	1.06171	2.57069	35.3331	0.0145367	-38.6689
HT	GPR171	1.06171	2.57069	35.3331	0.0145367	-38.6689
HT	GRAP2	1.06171	2.57069	35.3331	0.0145367	-38.6689
HT	MLKL	1.06171	2.57069	35.3331	0.0145367	-38.6689
HT	PPM1F-AS1	1.06171	2.57069	35.3331	0.0145367	-38.6689
HT	SFMBT1	1.06171	2.57069	35.3331	0.0145367	-38.6689
HT	ZNF717	1.06171	2.57069	35.3331	0.0145367	-38.6689
HT	ITGAX	1.05825	3.05381	2006955309686860	3.37452e-17	26.6977
HT	GBP1	1.04968	6.98362	43.3185	0.0117046	-38.2487
HT	CCDC9B	-1.04577	4.16487	-358.763	0.00123471	-33.8858
HT	INMT	-1.04577	4.16487	-358.763	0.00123471	-33.8858
HT	DEGS2	-1.0323	3.26869	-34.3545	0.0149774	-38.7269
HT	METTL17	1.02793	5.53106	25.6912	0.0203986	-39.3259
HT	SIAE	-1.02328	5.23287	-30.6883	0.0168869	-38.9596
HT	QPRT	1.01218	3.61727	44.215	0.0114524	-38.2064
HT	TTLL3	1.01218	3.61727	44.215	0.0114524	-38.2064
HT	MACIR	-1.00722	3.97944	-46.9064	0.0107548	-38.0845
HT	YWHAH	1.00475	4.12953	13.3282	0.0409421	-40.6759
HT	SLC25A24	0.996813	4.47909	15.7999	0.0341845	-40.3266
HT	APOL6	0.9958	6.46038	11.9134	0.0461096	-40.906
HT	MYL9	-0.993607	8.09546	-11.6584	0.0471776	-40.9503
HT	CTNNAL1	-0.992523	7.83135	-18.3062	0.0292389	-40.0238
HT	NFKBIL1	-0.989305	3.73632	-1876209787829630	3.62527e-17	26.5586
HT	NFXL1	-0.989305	3.73632	-1876209787829630	3.62527e-17	26.5586
HT	PEX11G	-0.989305	3.73632	-1876209787829630	3.62527e-17	26.5586
HT	TMEM64	-0.989305	3.73632	-1876209787829630	3.62527e-17	26.5586
HT	PHYH	-0.98775	8.18136	-43.1935	0.0117406	-38.2546
HT	EPC2	-0.980808	4.50585	-5.95912e+18	6.81365e-21	39.394
HT	FCHO2	-0.97657	5.37251	-12.4656	0.0439496	-40.8131
HT	ZNF557	0.966442	3.85677	5.87184e+18	6.92147e-21	39.3933
HT	LINC00665	-0.960154	4.61086	-910463095479830	7.82439e-17	25.0663
HT	C1R	0.95816	8.26007	17.4181	0.030824	-40.1261
HT	SDHAP1	-0.947299	-0.14328	-1.43723e+16	4.15449e-18	30.7608
HT	ACAD9	-0.945847	5.68548	-55.9557	0.00891474	-37.7206
HT	TCTN2	-0.94418	4.13101	-323.913	0.00137653	-34.0967
HT	TPST1	-0.941025	5.16916	-85.4439	0.00568251	-36.8471
HT	BNIPL	0.932821	3.33276	43.4415	0.0116694	-38.2428
HT	ELOC	-0.93074	4.00105	-16.6785	0.0322768	-40.2153
HT	CD320	-0.915144	6.27634	-12.6881	0.0431336	-40.7769
HT	STX4	0.913724	5.00501	14.9512	0.0362462	-40.44
HT	SRGAP1	-0.910822	5.72248	-11.7293	0.0468762	-40.9379
HT	SLC25A13	-0.909522	4.71928	-157.064	0.00297334	-35.5907
HT	TMEM120A	-0.909522	4.71928	-157.064	0.00297334	-35.5907
HT	IFNGR2	0.90757	3.21	20.5809	0.0258192	-39.7827
HT	CD82	0.900055	7.16571	31.8238	0.0162469	-38.8846
HT	ZNF322	-0.899059	5.19714	-15.1216	0.0358131	-40.4167
HT	SMC4	0.897629	5.17586	53.7238	0.00930921	-37.8046
HT	TC2N	0.896769	4.41239	31.7233	0.0163017	-38.8912
HT	AC008763.3	-0.89582	-0.16044	-1.35913e+16	4.40897e-18	30.6455
HT	PRR13	0.895094	5.69615	11.6308	0.0472965	-40.9552
HT	GPATCH3	-0.889955	3.22124	-29.6173	0.0175368	-39.0328
HT	PRANCR	-0.889955	3.22124	-29.6173	0.0175368	-39.0328
HT	XPO4	-0.889955	3.22124	-29.6173	0.0175368	-39.0328
HT	ZNF813	-0.889955	3.22124	-29.6173	0.0175368	-39.0328
HT	SRSF7	0.882675	8.08456	13.1154	0.0416463	-40.7089
HT	NUP62	0.882323	5.66498	149.409	0.00313567	-35.6938
HT	SUV39H2	-0.881485	3.48702	-835865570792579	8.56943e-17	24.8898
HT	IRF3	0.878354	5.19968	18.5377	0.0288515	-39.9979
HT	DHX16	0.877225	4.76373	12.0748	0.0454573	-40.8784
HT	TAF9B	-0.876075	5.89982	-20.4665	0.0259725	-39.7942
HT	HEBP2	0.873796	3.52501	299.767	0.0014948	-34.2566
HT	PLS3	-0.8691	8.64223	-12.0531	0.0455438	-40.8821
HT	F3	-0.866725	6.44885	-42.2744	0.0120123	-38.299
HT	C16orf89	-0.863166	4.90627	-16.6104	0.0324172	-40.2237
HT	BTBD19	0.852107	5.3702	24.2223	0.0217157	-39.4472
HT	VSIR	0.850241	6.1044	37.1307	0.0137895	-38.5666
HT	AL031666.1	-0.847997	2.14555	-5.1522e+18	7.9545e-21	39.3853
HT	AL080250.1	-0.847997	2.14555	-5.1522e+18	7.9545e-21	39.3853
HT	CDK18	-0.847997	2.14555	-5.1522e+18	7.9545e-21	39.3853
HT	HTRN	-0.847997	2.14555	-5.1522e+18	7.9545e-21	39.3853
HT	COL5A1	-0.847997	2.14555	-5.1522e+18	7.9545e-21	39.3853
HT	FAM122C	-0.847997	2.14555	-5.1522e+18	7.9545e-21	39.3853
HT	IRAK1	-0.847997	2.14555	-5.1522e+18	7.9545e-21	39.3853
HT	MMP19	-0.847997	2.14555	-5.1522e+18	7.9545e-21	39.3853
HT	RXFP1	-0.847997	2.14555	-5.1522e+18	7.9545e-21	39.3853
HT	SLC2A8	-0.847997	2.14555	-5.1522e+18	7.9545e-21	39.3853
HT	TENM2	-0.847997	2.14555	-5.1522e+18	7.9545e-21	39.3853
HT	ZNF747	-0.847997	2.14555	-5.1522e+18	7.9545e-21	39.3853
HT	MTERF4	-0.847051	6.63281	-115.304	0.00413103	-36.2286
HT	ARHGEF10L	0.844883	2.91156	801157596026605	8.96497e-17	24.8023
HT	BSPRY	0.844883	2.91156	801157596026605	8.96497e-17	24.8023
HT	TST	0.844883	2.91156	801157596026605	8.96497e-17	24.8023
HT	ZBTB22	0.844883	2.91156	801157596026605	8.96497e-17	24.8023
HT	AL513550.1	-0.834642	4.09449	-286.334	0.00156951	-34.3513
HT	DDT	-0.833819	5.4912	-114.922	0.00414563	-36.2354
HT	DERL1	0.832129	6.88444	19.9688	0.0266607	-39.8449
HT	DBNL	0.830181	2.80244	11.0749	0.049812	-41.0554
HT	GNG2	0.827687	4.73071	78.5701	0.00621284	-37.0202
HT	ANAPC13	-0.826066	6.55808	-18.5665	0.0288039	-39.9947
HT	ACAP2	0.823606	6.00789	13.1038	0.0416854	-40.7107
HT	RAB6A	-0.816753	5.69794	-32.7641	0.0157516	-38.8246
HT	MACROH2A2	-0.813341	3.32867	-30.753	0.0168491	-38.9552
HT	SNRNP48	-0.808602	4.56035	-766754474489467	9.39355e-17	24.7117
HT	WDFY3-AS2	-0.806333	4.39532	-11.9496	0.0459618	-40.8998
HT	LYAR	0.805665	5.33924	18.8216	0.0283895	-39.9666
HT	AC008264.2	0.803853	2.88421	11.6675	0.0471387	-40.9487
HT	GATM	-0.802951	5.81073	-21.3478	0.024835	-39.7074
HT	INSR	-0.796849	5.19848	-755608993390179	9.54105e-17	24.6815
HT	CRTC3	0.793954	4.70822	11.8188	0.0465005	-40.9223
HT	DIPK1A	0.792794	4.92439	16.32	0.0330296	-40.26
HT	TMEM17	-0.786225	4.93467	-21.4329	0.0247304	-39.6992
HT	MKKS	-0.777592	6.55543	-19.601	0.0271922	-39.8831
HT	CRCP	-0.775974	6.54987	-24.8343	0.0211475	-39.3958
HT	PI4KAP2	0.773489	2.12166	14.5413	0.0373306	-40.4971
HT	TTC39B	-0.773464	4.21249	-33.7871	0.015245	-38.7612
HT	YAF2	-0.77161	2.12009	-4.68809e+18	8.79493e-21	39.3783
HT	CFAP300	-0.763699	3.44776	-724175125203715	9.98229e-17	24.5938
HT	FAM50A	-0.763699	3.44776	-724175125203715	9.98229e-17	24.5938
HT	FEZ1	-0.763699	3.44776	-724175125203715	9.98229e-17	24.5938
HT	PHF2	-0.763699	3.44776	-724175125203715	9.98229e-17	24.5938
HT	SWSAP1	-0.763699	3.44776	-724175125203715	9.98229e-17	24.5938
HT	ZNF287	-0.763699	3.44776	-724175125203715	9.98229e-17	24.5938
HT	TCL6	0.760062	1.63262	19.5979	0.0271969	-39.8835
HT	CNPY3	0.759694	6.53002	11.7949	0.0466	-40.9265
HT	SND1	0.753225	7.26795	12.3047	0.0445586	-40.8398
HT	TMEM161A	0.750681	5.40401	21.3391	0.0248458	-39.7082
HT	CBSL	-0.750101	4.34742	-19.3159	0.0276187	-39.9133
HT	PTTG1	0.74915	7.14045	14.175	0.0383543	-40.5495
HT	RPL21	0.748477	4.78414	21.4705	0.0246844	-39.6956
HT	RHOG	0.742305	5.82049	27.9421	0.0186566	-39.1528
HT	ACSM5	0.742195	3.70727	32.4212	0.0159289	-38.8463
HT	C2orf76	0.742195	3.70727	32.4212	0.0159289	-38.8463
HT	LONP1	0.742195	3.70727	32.4212	0.0159289	-38.8463
HT	DYRK3	-0.73721	2.10862	-4.47909e+18	9.23222e-21	39.3744
HT	AC004477.1	-0.736966	1.37157	-2795299954160290	2.372e-17	27.3815
HT	AC004982.2	-0.736966	1.37157	-2795299954160290	2.372e-17	27.3815
HT	AC007191.1	-0.736966	1.37157	-2795299954160290	2.372e-17	27.3815
HT	AC009090.6	-0.736966	1.37157	-2795299954160290	2.372e-17	27.3815
HT	AC010969.2	0.736966	1.61723	4.4776e+18	9.23548e-21	39.3743
HT	AC011511.1	-0.736966	1.37157	-2795299954160290	2.372e-17	27.3815
HT	AC093323.1	-0.736966	1.37157	-2795299954160290	2.372e-17	27.3815
HT	AC097359.2	-0.736966	1.37157	-2795299954160290	2.372e-17	27.3815
HT	AC145207.5	0.736966	1.61723	4.4776e+18	9.23548e-21	39.3743
HT	ADAL	-0.736966	1.37157	-2795299954160290	2.372e-17	27.3815
HT	ADAM22	0.736966	1.61723	4.4776e+18	9.23548e-21	39.3743
HT	AGBL4	0.736966	1.61723	4.4776e+18	9.23548e-21	39.3743
HT	AL035701.1	-0.736966	1.37157	-2795299954160290	2.372e-17	27.3815
HT	AL353748.3	-0.736966	1.37157	-2795299954160290	2.372e-17	27.3815
HT	AL590399.1	-0.736966	1.37157	-2795299954160290	2.372e-17	27.3815
HT	AL590705.1	-0.736966	1.37157	-2795299954160290	2.372e-17	27.3815
HT	AP002026.1	-0.736966	1.37157	-2795299954160290	2.372e-17	27.3815
HT	AQP9	-0.736966	1.37157	-2795299954160290	2.372e-17	27.3815
HT	ATP6AP1L	-0.736966	1.37157	-2795299954160290	2.372e-17	27.3815
HT	BICDL2	0.736966	1.61723	4.4776e+18	9.23548e-21	39.3743
HT	CASZ1	-0.736966	1.37157	-2795299954160290	2.372e-17	27.3815
HT	CCDC122	-0.736966	1.37157	-2795299954160290	2.372e-17	27.3815
HT	CCDC74A	-0.736966	1.37157	-2795299954160290	2.372e-17	27.3815
HT	CCNQ	0.736966	1.61723	4.4776e+18	9.23548e-21	39.3743
HT	CEP170B	0.736966	1.61723	4.4776e+18	9.23548e-21	39.3743
HT	CHSY3	-0.736966	1.37157	-2795299954160290	2.372e-17	27.3815
HT	CLCNKA	-0.736966	1.37157	-2795299954160290	2.372e-17	27.3815
HT	CLIP3	0.736966	1.61723	4.4776e+18	9.23548e-21	39.3743
HT	COX17	-0.736966	1.37157	-2795299954160290	2.372e-17	27.3815
HT	CX3CL1	0.736966	1.61723	4.4776e+18	9.23548e-21	39.3743
HT	D2HGDH	-0.736966	1.37157	-2795299954160290	2.372e-17	27.3815
HT	DCAF15	0.736966	1.61723	4.4776e+18	9.23548e-21	39.3743
HT	DNAAF3	-0.736966	1.37157	-2795299954160290	2.372e-17	27.3815
HT	DNAJC12	-0.736966	1.37157	-2795299954160290	2.372e-17	27.3815
HT	DNHD1	0.736966	1.61723	4.4776e+18	9.23548e-21	39.3743
HT	DPM3	-0.736966	1.37157	-2795299954160290	2.372e-17	27.3815
HT	EFHD1	-0.736966	1.37157	-2795299954160290	2.372e-17	27.3815
HT	ENKD1	-0.736966	1.37157	-2795299954160290	2.372e-17	27.3815
HT	ENO4	-0.736966	1.37157	-2795299954160290	2.372e-17	27.3815
HT	FADS2	0.736966	1.61723	4.4776e+18	9.23548e-21	39.3743
HT	FBLN5	0.736966	1.61723	4.4776e+18	9.23548e-21	39.3743
HT	FBXO2	0.736966	1.61723	4.4776e+18	9.23548e-21	39.3743
HT	FCRLB	0.736966	1.61723	4.4776e+18	9.23548e-21	39.3743
HT	FRK	-0.736966	1.37157	-2795299954160290	2.372e-17	27.3815
HT	GAS1RR	-0.736966	1.37157	-2795299954160290	2.372e-17	27.3815
HT	GOLGA2P7	-0.736966	1.37157	-2795299954160290	2.372e-17	27.3815
HT	GPC1	-0.736966	1.37157	-2795299954160290	2.372e-17	27.3815
HT	HAP1	0.736966	1.61723	4.4776e+18	9.23548e-21	39.3743
HT	IL17RB	-0.736966	1.37157	-2795299954160290	2.372e-17	27.3815
HT	ITGA10	-0.736966	1.37157	-2795299954160290	2.372e-17	27.3815
HT	JHY	0.736966	1.61723	4.4776e+18	9.23548e-21	39.3743
HT	KANSL1-AS1	0.736966	1.61723	4.4776e+18	9.23548e-21	39.3743
HT	LINC01719	-0.736966	1.37157	-2795299954160290	2.372e-17	27.3815
HT	LINC02606	-0.736966	1.37157	-2795299954160290	2.372e-17	27.3815
HT	LYNX1	-0.736966	1.37157	-2795299954160290	2.372e-17	27.3815
HT	MBNL1-AS1	0.736966	1.61723	4.4776e+18	9.23548e-21	39.3743
HT	METRN	-0.736966	1.37157	-2795299954160290	2.372e-17	27.3815
HT	MFSD12	0.736966	1.61723	4.4776e+18	9.23548e-21	39.3743
HT	MID2	-0.736966	1.37157	-2795299954160290	2.372e-17	27.3815
HT	MORN3	-0.736966	1.37157	-2795299954160290	2.372e-17	27.3815
HT	MYCL	-0.736966	1.37157	-2795299954160290	2.372e-17	27.3815
HT	MYT1	0.736966	1.61723	4.4776e+18	9.23548e-21	39.3743
HT	NAV3	-0.736966	1.37157	-2795299954160290	2.372e-17	27.3815
HT	NCF1C	0.736966	1.61723	4.4776e+18	9.23548e-21	39.3743
HT	NFATC1	-0.736966	1.37157	-2795299954160290	2.372e-17	27.3815
HT	NMUR2	0.736966	1.61723	4.4776e+18	9.23548e-21	39.3743
HT	NUDT11	-0.736966	1.37157	-2795299954160290	2.372e-17	27.3815
HT	OSBP2	-0.736966	1.37157	-2795299954160290	2.372e-17	27.3815
HT	OSBPL5	-0.736966	1.37157	-2795299954160290	2.372e-17	27.3815
HT	PCDH17	0.736966	1.61723	4.4776e+18	9.23548e-21	39.3743
HT	PDGFB	0.736966	1.61723	4.4776e+18	9.23548e-21	39.3743
HT	PHETA1	-0.736966	1.37157	-2795299954160290	2.372e-17	27.3815
HT	PHTF1	0.736966	1.61723	4.4776e+18	9.23548e-21	39.3743
HT	PKD1P6	-0.736966	1.37157	-2795299954160290	2.372e-17	27.3815
HT	PKDCC	-0.736966	1.37157	-2795299954160290	2.372e-17	27.3815
HT	RASGRP1	0.736966	1.61723	4.4776e+18	9.23548e-21	39.3743
HT	RNF215	0.736966	1.61723	4.4776e+18	9.23548e-21	39.3743
HT	RTEL1	-0.736966	1.37157	-2795299954160290	2.372e-17	27.3815
HT	RXRG	-0.736966	1.37157	-2795299954160290	2.372e-17	27.3815
HT	S100A9	0.736966	1.61723	4.4776e+18	9.23548e-21	39.3743
HT	SLC25A10	-0.736966	1.37157	-2795299954160290	2.372e-17	27.3815
HT	SLC36A1	0.736966	1.61723	4.4776e+18	9.23548e-21	39.3743
HT	SPEG	-0.736966	1.37157	-2795299954160290	2.372e-17	27.3815
HT	ST3GAL3	-0.736966	1.37157	-2795299954160290	2.372e-17	27.3815
HT	STARD3NL	-0.736966	1.37157	-2795299954160290	2.372e-17	27.3815
HT	SYTL1	0.736966	1.61723	4.4776e+18	9.23548e-21	39.3743
HT	TENM1	0.736966	1.61723	4.4776e+18	9.23548e-21	39.3743
HT	TENT4A	-0.736966	1.37157	-2795299954160290	2.372e-17	27.3815
HT	TMEM164	0.736966	1.61723	4.4776e+18	9.23548e-21	39.3743
HT	TMEM250	0.736966	1.61723	4.4776e+18	9.23548e-21	39.3743
HT	U73166.1	-0.736966	1.37157	-2795299954160290	2.372e-17	27.3815
HT	USH1C	-0.736966	1.37157	-2795299954160290	2.372e-17	27.3815
HT	ZBTB25	-0.736966	1.37157	-2795299954160290	2.372e-17	27.3815
HT	ZBTB7B	-0.736966	1.37157	-2795299954160290	2.372e-17	27.3815
HT	ZFAND4	-0.736966	1.37157	-2795299954160290	2.372e-17	27.3815
HT	ZNF212	0.736966	1.61723	4.4776e+18	9.23548e-21	39.3743
HT	ZNF503	-0.736966	1.37157	-2795299954160290	2.372e-17	27.3815
HT	ZNF98	-0.736966	1.37157	-2795299954160290	2.372e-17	27.3815
HT	C20orf27	-0.734612	5.10036	-66.7018	0.0073952	-37.3581
HT	C3orf18	-0.731899	3.16856	-24.3572	0.0215879	-39.4358
HT	PNPLA2	-0.731899	3.16856	-24.3572	0.0215879	-39.4358
HT	RPGRIP1L	-0.731899	3.16856	-24.3572	0.0215879	-39.4358
HT	TBC1D22B	-0.731899	3.16856	-24.3572	0.0215879	-39.4358
HT	THAP9	-0.731899	3.16856	-24.3572	0.0215879	-39.4358
HT	UBALD1	-0.731899	3.16856	-24.3572	0.0215879	-39.4358
HT	SMARCA1	-0.731476	6.89374	-59.2818	0.00838364	-37.6014
HT	NKIRAS1	0.730735	3.06001	48.4226	0.0103969	-38.0189
HT	WDSUB1	-0.729214	4.04624	-38.1791	0.0133872	-38.5092
HT	MBIP	-0.721382	8.16769	-22.5179	0.0234663	-39.5975
HT	PSMB3	0.719721	7.10435	25.8495	0.0202658	-39.3132
HT	PARP1	0.718239	6.94348	11.3594	0.0484929	-41.0035
HT	ANP32A	0.714573	7.68498	86.9236	0.00557965	-36.8117
HT	LPCAT3	0.708828	5.97502	12.5244	0.0437312	-40.8035
HT	C8orf33	-0.707755	6.35166	-13.1763	0.0414423	-40.6994
HT	CAV1	-0.70248	9.55507	-18.9273	0.0282212	-39.9551
HT	CWF19L2	-0.697507	5.39223	-4.23786e+18	9.79236e-21	39.3691
HT	ACSM3	0.695675	3.17466	1319343647468150	5.27288e-17	25.8319
HT	ARHGEF40	0.695675	3.17466	1319343647468150	5.27288e-17	25.8319
HT	CDAN1	0.695675	3.17466	1319343647468150	5.27288e-17	25.8319
HT	CTNS	0.695675	3.17466	1319343647468150	5.27288e-17	25.8319
HT	KLHL2	0.695675	3.17466	1319343647468150	5.27288e-17	25.8319
HT	CYB5D2	-0.692778	6.77275	-13.2177	0.0413049	-40.693
HT	LIMCH1	-0.69212	7.30114	-15.0102	0.036095	-40.4319
HT	CHCHD4	-0.68804	4.04563	-236.041	0.00192761	-34.7499
HT	FOXP2	-0.68804	4.04563	-236.041	0.00192761	-34.7499
HT	NCOA4	0.681703	5.13964	49.1098	0.0102423	-37.9898
HT	PPP1CA	0.678044	7.53387	18.1075	0.0295797	-40.0462
HT	PVR	0.676981	4.78094	64.264	0.00769398	-37.4349
HT	FLI1	0.676573	4.62996	61.432	0.00807184	-37.5279
HT	GPCPD1	0.676573	4.62996	61.432	0.00807184	-37.5279
HT	FKBP15	-0.675994	5.99073	-12.0802	0.0454358	-40.8775
HT	ANKIB1	0.675349	4.40712	21.7285	0.0243731	-39.671
HT	FRYL	0.674875	4.26446	20.1755	0.0263706	-39.8237
HT	CYFIP2	0.669337	4.95055	28.6057	0.0181968	-39.1044
HT	TRIM58	-0.668123	3.62926	-1267090904326500	5.50454e-17	25.7485
HT	ZNF333	-0.668123	3.62926	-1267090904326500	5.50454e-17	25.7485
HT	GALNT11	-0.664251	5.58072	-29.6927	0.0174894	-39.0275
HT	TRIM27	0.664088	6.81894	11.0956	0.0497138	-41.0516
HT	GATAD1	0.663764	5.80878	17.911	0.0299243	-40.0687
HT	IVD	-0.662819	8.48767	-44.4848	0.0113785	-38.1939
HT	PCBD1	-0.650103	7.41394	-13.1977	0.0413712	-40.6961
HT	ALCAM	-0.642402	6.67123	-12.3986	0.0442013	-40.8242
HT	MYO10	-0.640688	6.2436	-17.2883	0.0310697	-40.1415
HT	ANK3	0.633897	5.69579	17.765	0.0301855	-40.0855
HT	SNRPN	-0.6301	4.96771	-12.8726	0.0424792	-40.7473
HT	MPST	-0.628489	4.15844	-47.298	0.0106601	-38.0674
HT	HMGXB4	-0.623818	5.3375	-12.3182	0.0445067	-40.8375
HT	LINC01886	-0.623213	4.38665	-3.78647e+18	1.1039e-20	39.3566
HT	UXS1	0.622822	4.26441	19.9221	0.0267271	-39.8497
HT	RNF115	-0.621445	4.62325	-107.316	0.00445893	-36.3767
HT	AL050341.2	-0.621352	3.40031	-589195340554570	1.24322e-16	24.168
HT	DHODH	-0.621352	3.40031	-589195340554570	1.24322e-16	24.168
HT	SLC25A27	-0.621352	3.40031	-589195340554570	1.24322e-16	24.168
HT	TMTC3	-0.621352	3.40031	-589195340554570	1.24322e-16	24.168
HT	TMEM141	-0.61707	6.97953	-12.6949	0.0431093	-40.7758
HT	LCN10	0.614443	2.98838	582643846753339	1.25809e-16	24.1449
HT	GINM1	-0.614032	8.12454	-29.4754	0.0176266	-39.0427
HT	FAM217B	0.611062	5.40403	14.3187	0.0379464	-40.5288
HT	ZNF117	0.610742	4.80302	57.9762	0.00858463	-37.6474
HT	HDGFL3	-0.604706	5.13443	-573410648001294	1.27966e-16	24.112
HT	ITGB5	0.603808	3.61501	207.144	0.00221493	-35.0195
HT	TYK2	0.603808	3.61501	207.144	0.00221493	-35.0195
HT	UBL7-AS1	0.603808	3.61501	207.144	0.00221493	-35.0195
HT	IPO9	-0.603095	6.40753	-135678	2.23325e-06	-21.6353
HT	PDE12	0.601558	4.21558	103.882	0.00461592	-36.4438
HT	PARVA	-0.597883	5.9311	-24.7893	0.0211882	-39.3995
HT	UBLCP1	0.596911	6.36991	13.5761	0.0401504	-40.6381
HT	ERAP1	0.594463	5.04723	12.7334	0.0429711	-40.7696
HT	KEAP1	-0.59401	5.70085	-19.8387	0.0268464	-39.8583
HT	TBL1XR1	0.590473	6.47125	19.2665	0.0276939	-39.9186
HT	CFDP1	-0.588806	7.3779	-11.6955	0.0470194	-40.9438
HT	HACD4	0.585647	5.38709	555337597149924	1.32402e-16	24.0459
HT	AASDH	-0.585342	4.82735	-18.8326	0.0283719	-39.9654
HT	E4F1	0.584981	4.5689	35.2261	0.0145837	-38.6752
HT	ALS2	0.582366	3.33073	21.8799	0.0241939	-39.6567
HT	CLUL1	-0.579579	4.00947	-198.832	0.00231358	-35.104
HT	FZD5	-0.579579	4.00947	-198.832	0.00231358	-35.104
HT	TMEM265	-0.579184	5.00353	-64.1564	0.00770772	-37.4384
HT	CDH5	0.57628	2.7325	19.1783	0.0278291	-39.928
HT	CTDP1	0.57628	2.7325	19.1783	0.0278291	-39.928
HT	EXOC8	0.57628	2.7325	19.1783	0.0278291	-39.928
HT	PASK	0.57628	2.7325	19.1783	0.0278291	-39.928
HT	PRR3	0.57628	2.7325	19.1783	0.0278291	-39.928
HT	SLC22A23	0.57628	2.7325	19.1783	0.0278291	-39.928
HT	SNHG26	0.57628	2.7325	19.1783	0.0278291	-39.928
HT	STK35	0.57628	2.7325	19.1783	0.0278291	-39.928
HT	ZNF225	0.57628	2.7325	19.1783	0.0278291	-39.928
HT	AC020659.1	-0.575607	3.29979	-13.8559	0.0392915	-40.5962
HT	TIMM13	-0.573086	6.25896	-21.5723	0.0245607	-39.6859
HT	SLC39A11	-0.573065	4.71737	-20.0621	0.026529	-39.8353
HT	AKIP1	0.572086	5.54111	23.7197	0.022205	-39.4904
HT	SRSF5	0.563166	8.93383	14.114	0.0385302	-40.5583
HT	LNX1	-0.56173	4.95114	-33.826	0.0152264	-38.7588
HT	CCNB1IP1	-0.561044	7.10057	-35.7121	0.0143727	-38.6469
HT	CHCHD3	-0.559632	7.11125	-46.2258	0.0109233	-38.1147
HT	SPIDR	-0.558309	6.12025	-57.1716	0.00871319	-37.6762
HT	ATP2C1	-0.55595	5.5796	-22.03	0.0240189	-39.6426
HT	AGK	-0.55531	4.35792	-54.2728	0.00920907	-37.7836
HT	ELP5	0.553214	6.17474	25.2262	0.0207985	-39.3635
HT	CFL2	-0.552008	6.67497	-109.018	0.0043849	-36.3442
HT	ABCA2	-0.550337	3.59	-1043710021310520	6.76609e-17	25.3482
HT	ATPAF1	-0.550337	3.59	-1043710021310520	6.76609e-17	25.3482
HT	RHOBTB2	-0.550337	3.59	-1043710021310520	6.76609e-17	25.3482
HT	FAM50B	-0.549653	4.13788	-24.0104	0.0219194	-39.4653
HT	GNPDA1	-0.549232	7.02475	-16.1655	0.0333647	-40.2795
HT	POLR3F	-0.549216	4.36199	-3.33689e+18	1.2628e-20	39.3391
HT	ST3GAL4	-0.548012	1.30859	-2078602731702140	3.2509e-17	26.7701
HT	SS18	-0.543505	6.48291	-40.0602	0.0127197	-38.41
HT	CAV2	-0.53704	8.8435	-11.8846	0.0462278	-40.9109
HT	HCG11	-0.535215	3.8221	-24.9249	0.0210657	-39.3883
HT	NAGLU	-0.535215	3.8221	-24.9249	0.0210657	-39.3883
HT	RBM10	-0.535215	3.8221	-24.9249	0.0210657	-39.3883
HT	CTTNBP2	-0.535107	3.10296	-17.8081	0.0301079	-40.0805
HT	HSD11B1L	-0.535107	3.10296	-17.8081	0.0301079	-40.0805
HT	LDLR	-0.535107	3.10296	-17.8081	0.0301079	-40.0805
HT	LINC02693	-0.535107	3.10296	-17.8081	0.0301079	-40.0805
HT	RPP21	-0.535107	3.10296	-17.8081	0.0301079	-40.0805
HT	TIE1	-0.535107	3.10296	-17.8081	0.0301079	-40.0805
HT	ZBTB24	-0.535107	3.10296	-17.8081	0.0301079	-40.0805
HT	IMPACT	-0.534471	5.99561	-16.9945	0.03164	-40.1767
HT	EFHC1	-0.532005	6.1292	-13.4665	0.0404967	-40.6547
HT	WDR35	-0.530682	3.99317	-182.057	0.00254104	-35.2859
HT	PRPF4	-0.530517	5.47953	-13.155	0.0415135	-40.7027
HT	AP3M2	-0.529249	4.58003	-34.8632	0.0147451	-38.6965
HT	GIGYF2	-0.529189	6.5137	-18.0634	0.0296564	-40.0513
HT	RFC4	0.527995	3.5451	13.096	0.0417118	-40.712
HT	TAF9	0.524182	7.44061	51.4067	0.00975617	-37.8955
HT	RRP1	0.522427	4.00477	3.17412e+18	1.33181e-20	39.3309
HT	SINHCAF	0.520721	5.44656	23.8659	0.0220605	-39.4777
HT	AAK1	-0.519172	3.68383	-16.0773	0.0335588	-40.2908
HT	AP1AR	0.519085	4.92349	107.195	0.00446431	-36.3791
HT	ZNRD1	0.518271	5.88308	11.0581	0.049892	-41.0585
HT	GRIPAP1	0.515073	5.93348	11.1223	0.0495872	-41.0467
HT	THAP4	-0.511196	4.69675	-17.8962	0.0299506	-40.0704
HT	PRXL2A	-0.506226	8.26548	-18.6633	0.0286452	-39.984
HT	PRNP	-0.505208	7.33491	-36.4195	0.014076	-38.6065
HT	MAP3K14	0.494971	3.78968	21.6218	0.0245009	-39.6811
HT	PBX2	0.494971	3.78968	21.6218	0.0245009	-39.6811
HT	ZNFX1	0.492471	5.86588	13.2888	0.0410707	-40.682
HT	C22orf46	-0.490471	5.01898	-44.5341	0.0113651	-38.1916
HT	INTS3	0.485959	5.82644	11.2086	0.0491835	-41.0309
HT	ASB6	0.485909	6.24053	275.193	0.00163721	-34.4332
HT	AC004816.1	-0.485427	2.02469	-2.94932e+18	1.44007e-20	39.3174
HT	AC099343.4	-0.485427	2.02469	-2.94932e+18	1.44007e-20	39.3174
HT	AC132192.2	-0.485427	2.02469	-2.94932e+18	1.44007e-20	39.3174
HT	AKT1S1	-0.485427	2.02469	-2.94932e+18	1.44007e-20	39.3174
HT	ARFGAP1	-0.485427	2.02469	-2.94932e+18	1.44007e-20	39.3174
HT	BYSL	-0.485427	2.02469	-2.94932e+18	1.44007e-20	39.3174
HT	CCDC13	-0.485427	2.02469	-2.94932e+18	1.44007e-20	39.3174
HT	DLEC1	-0.485427	2.02469	-2.94932e+18	1.44007e-20	39.3174
HT	GSEC	-0.485427	2.02469	-2.94932e+18	1.44007e-20	39.3174
HT	IFFO1	-0.485427	2.02469	-2.94932e+18	1.44007e-20	39.3174
HT	INTS5	-0.485427	2.02469	-2.94932e+18	1.44007e-20	39.3174
HT	MME	-0.485427	2.02469	-2.94932e+18	1.44007e-20	39.3174
HT	MYRIP	-0.485427	2.02469	-2.94932e+18	1.44007e-20	39.3174
HT	P2RY1	-0.485427	2.02469	-2.94932e+18	1.44007e-20	39.3174
HT	PEX7	-0.485427	2.02469	-2.94932e+18	1.44007e-20	39.3174
HT	PNPLA7	-0.485427	2.02469	-2.94932e+18	1.44007e-20	39.3174
HT	RAI2	-0.485427	2.02469	-2.94932e+18	1.44007e-20	39.3174
HT	RNF182	-0.485427	2.02469	-2.94932e+18	1.44007e-20	39.3174
HT	SCML4	-0.485427	2.02469	-2.94932e+18	1.44007e-20	39.3174
HT	SLC26A9	-0.485427	2.02469	-2.94932e+18	1.44007e-20	39.3174
HT	TOB1-AS1	-0.485427	2.02469	-2.94932e+18	1.44007e-20	39.3174
HT	WDR81	-0.485427	2.02469	-2.94932e+18	1.44007e-20	39.3174
HT	ZNF454	-0.485427	2.02469	-2.94932e+18	1.44007e-20	39.3174
HT	ZNF846	-0.485427	2.02469	-2.94932e+18	1.44007e-20	39.3174
HT	AMMECR1L	-0.484398	4.2545	-12.375	0.0442903	-40.8281
HT	PDIK1L	-0.483521	4.95084	-18.1304	0.02954	-40.0436
HT	KIF21A	0.482313	3.03242	457351752355495	1.62777e-16	23.6452
HT	RUNX1	0.482313	3.03242	457351752355495	1.62777e-16	23.6452
HT	TMEM273	0.482313	3.03242	457351752355495	1.62777e-16	23.6452
HT	INTS4	0.476269	4.13206	451620692725100	1.64976e-16	23.6192
HT	CDK5RAP3	0.474832	8.11266	11.5391	0.0476941	-40.9714
HT	NOM1	-0.474533	3.97446	-162.795	0.0028621	-35.5167
HT	SCPEP1	-0.471326	9.81428	-11.9826	0.0458277	-40.8941
HT	ALKBH4	-0.470303	4.68312	-16.4646	0.0327219	-40.2419
HT	ALG6	-0.470137	5.0122	-42.6879	0.0118886	-38.2789
HT	RAB29	0.468604	7.00373	35.0171	0.0146763	-38.6875
HT	TAF1C	-0.466469	1.29946	-15.3843	0.0351648	-40.3813
HT	EBF2	0.46407	3.25186	880105800571176	8.11186e-17	24.9963
HT	GSR	0.46407	3.25186	880105800571176	8.11186e-17	24.9963
HT	LRCH4	0.46407	3.25186	880105800571176	8.11186e-17	24.9963
HT	RAP2A	0.46407	3.25186	880105800571176	8.11186e-17	24.9963
HT	SLC35A2	0.46407	3.25186	880105800571176	8.11186e-17	24.9963
HT	ARRDC1-AS1	-0.463296	3.34762	-439319009382225	1.69896e-16	23.5622
HT	ATP7A	-0.463296	3.34762	-439319009382225	1.69896e-16	23.5622
HT	CXXC4	-0.463296	3.34762	-439319009382225	1.69896e-16	23.5622
HT	LMLN	-0.463296	3.34762	-439319009382225	1.69896e-16	23.5622
HT	TCF19	-0.463296	3.34762	-439319009382225	1.69896e-16	23.5622
HT	RUVBL1	0.459615	6.03612	15.9343	0.0338785	-40.3091
HT	COX5B	-0.459346	7.06747	-87.1213	0.00556618	-36.807
HT	C1orf174	-0.458917	5.84539	-15.8638	0.0340383	-40.3183
HT	FUBP3	0.453326	4.48113	14.5852	0.0372116	-40.4909
HT	LONP2	-0.447012	7.89826	-301.941	0.00148335	-34.2417
HT	DRAP1	0.441056	7.446	16.1594	0.0333779	-40.2803
HT	NRAS	-0.439629	6.03661	-61.8281	0.00801684	-37.5147
HT	CREB1	0.437518	5.32923	26.1858	0.0199894	-39.2866
HT	C12orf45	0.436652	5.50868	12.4124	0.044149	-40.8219
HT	CSGALNACT1	-0.435795	6.41787	-413241495702089	1.81325e-16	23.4359
HT	ST3GAL1	-0.434348	8.26048	-24.9105	0.0210787	-39.3895
HT	FGF7P3	0.434081	2.15227	11.3981	0.0483186	-40.9965
HT	NDUFA6	-0.433436	8.23578	-41.022	0.0124027	-38.361
HT	SLCO2B1	0.431592	5.01586	2.62224e+18	1.63193e-20	39.2919
HT	AGO4	0.431228	3.49996	20.0823	0.0265007	-39.8332
HT	C10orf143	0.431228	3.49996	20.0823	0.0265007	-39.8332
HT	C1orf74	0.431228	3.49996	20.0823	0.0265007	-39.8332
HT	JARID2	0.431228	3.49996	20.0823	0.0265007	-39.8332
HT	CCDC125	-0.430977	3.78736	-20.0706	0.026517	-39.8344
HT	EPB41L1	-0.430977	3.78736	-20.0706	0.026517	-39.8344
HT	EXOC3-AS1	-0.430977	3.78736	-20.0706	0.026517	-39.8344
HT	GRHL2	-0.430977	3.78736	-20.0706	0.026517	-39.8344
HT	HERC6	-0.430977	3.78736	-20.0706	0.026517	-39.8344
HT	KAT2B	-0.430977	3.78736	-20.0706	0.026517	-39.8344
HT	ZNF620	-0.430977	3.78736	-20.0706	0.026517	-39.8344
HT	NDRG3	0.430531	5.56021	18.6791	0.0286196	-39.9823
HT	SUMF1	-0.429619	6.6455	-30.781	0.0168328	-38.9533
HT	METTL14	-0.425731	6.38691	-2.58662e+18	1.65584e-20	39.2885
HT	ARPC5L	0.425458	6.01335	11.3026	0.0487507	-41.0138
HT	SMS	-0.422573	7.44372	-27.6767	0.0188468	-39.1725
HT	LIAS	-0.422563	5.30058	-40992.2	7.98005e-06	-24.1057
HT	SHMT1	0.422506	6.5044	14.7205	0.0368489	-40.4719
HT	BUB3	0.422363	7.64238	84.2534	0.00576796	-36.876
HT	C12orf57	-0.418523	5.99359	-13.9264	0.0390805	-40.5858
HT	HEATR1	0.417755	4.23539	12.5579	0.0436077	-40.798
HT	ACTR6	-0.416083	3.79729	-117.651	0.00404342	-36.187
HT	UBR5	0.415455	5.0791	393953656023854	1.90786e-16	23.3372
HT	DMAC2L	-0.415206	5.56078	-19.6371	0.0271392	-39.8794
HT	RPF2	-0.412916	6.75139	-22.7761	0.0231838	-39.574
HT	ITFG2	-0.411925	6.39611	-17.7696	0.0301771	-40.085
HT	NUDT16	-0.411925	6.39611	-17.7696	0.0301771	-40.085
HT	AC024075.2	-0.40799	3.54255	-773750461875847	9.30321e-17	24.7304
HT	AHDC1	-0.40799	3.54255	-773750461875847	9.30321e-17	24.7304
HT	KIF1B	-0.40799	3.54255	-773750461875847	9.30321e-17	24.7304
HT	MAF1	-0.40799	3.54255	-773750461875847	9.30321e-17	24.7304
HT	RANBP10	-0.40799	3.54255	-773750461875847	9.30321e-17	24.7304
HT	ZNF446	-0.40799	3.54255	-773750461875847	9.30321e-17	24.7304
HT	CCDC18-AS1	0.407486	6.05621	16.7872	0.0320549	-40.2019
HT	HTATSF1	-0.407219	6.10474	-37.9307	0.0134804	-38.5226
HT	NUP107	-0.404944	5.52655	-12.7291	0.0429866	-40.7702
HT	PIH1D1	0.403613	6.49181	133.553	0.00353321	-35.9253
HT	VDAC2	-0.402188	8.83207	-17.0461	0.0315384	-40.1705
HT	HMGB1	0.399923	9.93014	48.2108	0.0104455	-38.0279
HT	PTPRK	0.396025	2.9749	198.776	0.00231427	-35.1046
HT	ANKRD39	0.394915	5.25993	12.4138	0.0441437	-40.8217
HT	PRTG	0.394915	5.25993	12.4138	0.0441437	-40.8217
HT	PAK2	0.390306	6.32152	229.052	0.00199024	-34.8119
HT	AFAP1L2	-0.389867	7.32293	-36.6388	0.0139865	-38.5941
HT	ERGIC3	-0.388094	8.34995	-59.8964	0.00829216	-37.5802
HT	MED15	-0.386139	4.68854	-13.9661	0.0389628	-40.58
HT	HDAC1	0.384679	8.41019	56.4892	0.00882522	-37.701
HT	MRPL45	-0.384489	6.8175	-12.303	0.0445651	-40.8401
HT	RNF14	-0.383719	6.41491	-15.8681	0.0340286	-40.3177
HT	NUCB1	-0.381928	7.81087	-17.4048	0.030849	-40.1277
HT	DTX2	-0.381417	1.99002	-2.31738e+18	1.86127e-20	39.2586
HT	PLOD1	0.378896	5.8427	35.2925	0.0145545	-38.6713
HT	EIF1AX	-0.37776	7.71294	-12.1875	0.0450122	-40.8594
HT	RABEP1	0.376379	5.01863	12.2443	0.0447911	-40.8498
HT	CYB5D1	-0.375443	4.93452	-54.5021	0.00916787	-37.7749
HT	HARS2	-0.372517	5.34176	-353238000563828	2.14267e-16	23.1121
HT	RBMS1	-0.37041	5.48277	-16.5577	0.0325267	-40.2303
HT	SENP6	0.368036	4.64122	22.1623	0.0238666	-39.6303
HT	SCARB2	0.36526	6.73525	19.0046	0.0280993	-39.9467
HT	SHISA5	0.364616	7.22867	20.4173	0.026039	-39.7992
HT	COL6A1	-0.364414	4.75371	-11.7245	0.0468962	-40.9387
HT	FAM216A	0.36437	4.05746	2.21382e+18	1.95405e-20	39.2444
HT	TRMU	0.36437	4.05746	2.21382e+18	1.95405e-20	39.2444
HT	PCYT1A	0.362647	5.23842	16.2107	0.033266	-40.2738
HT	SCAMP4	-0.362634	3.93716	-124.406	0.00381023	-36.0717
HT	LYSMD3	-0.3623	5.21729	-74.8174	0.00654488	-37.1212
HT	MRM2	0.359894	5.87321	40.8975	0.0124429	-38.3673
HT	CLINT1	-0.358367	6.46497	-16.8796	0.0318688	-40.1907
HT	ATP6AP2	-0.358106	9.66636	-16.1951	0.0333	-40.2758
HT	TMEM19	0.356964	5.5636	28.7132	0.0181244	-39.0967
HT	THBS3	0.356584	3.69742	122.331	0.00387905	-36.1065
HT	SPATA13	0.355524	5.09906	17707.9	1.94923e-05	-25.8382
HT	AC079781.5	0.355426	4.81439	337031419006800	2.25246e-16	23.0151
HT	RPIA	0.355426	4.81439	337031419006800	2.25246e-16	23.0151
HT	TRAPPC2	0.355426	4.81439	337031419006800	2.25246e-16	23.0151
HT	PPP2CB	-0.353138	8.24786	-17.6555	0.0303841	-40.0982
HT	CNOT7	-0.350968	7.41076	-332804471143110	2.28291e-16	22.9891
HT	EIF3L	-0.350767	10.2039	-11.2596	0.048948	-41.0216
HT	PRELID3B	-0.348327	6.94961	-17.2037	0.0312318	-40.1516
HT	COX8A	-0.347271	5.86534	-60.5697	0.00819414	-37.5571
HT	UVRAG	0.341425	4.30229	58.9602	0.00843231	-37.6127
HT	GOLGB1	-0.337297	7.11593	-24.3816	0.021565	-39.4337
HT	CARD6	-0.336146	4.06672	-14.6838	0.0369466	-40.4771
HT	ETV6	-0.336146	4.06672	-14.6838	0.0369466	-40.4771
HT	YAP1	-0.336146	4.06672	-14.6838	0.0369466	-40.4771
HT	CARS2	0.333923	4.17951	316640908075955	2.4071e-16	22.8863
HT	MSMO1	-0.333331	6.69516	-18.0167	0.029738	-40.0566
HT	GCLC	-0.330695	6.07923	-30.8028	0.0168201	-38.9519
HT	UNC45A	0.330171	4.29479	13.3731	0.0407965	-40.669
HT	DSTN	-0.326779	10.7814	-1.98542e+18	2.19407e-20	39.2058
HT	ARMC8	0.326137	5.5837	11.2739	0.0488822	-41.019
HT	TMEM243	0.322438	7.60587	15.8882	0.033983	-40.3151
HT	PTGR2	0.319384	5.63316	29.0214	0.0179199	-39.0747
HT	ATP6V1D	-0.318159	8.30113	-22.21	0.0238122	-39.6259
HT	C1orf210	-0.314168	5.38065	-68.1824	0.00722448	-37.3128
HT	CFH	0.313798	8.4128	11.6663	0.0471439	-40.9489
HT	MCM2	-0.313191	3.7481	-14.5853	0.0372113	-40.4909
HT	TIGD6	-0.313191	3.7481	-14.5853	0.0372113	-40.4909
HT	CAND1	0.312694	7.0949	14.91	0.0363525	-40.4457
HT	C1orf131	-0.311728	5.8535	-54.3704	0.00919149	-37.7799
HT	RPL7L1	-0.31145	7.7478	-15.3458	0.0352586	-40.3865
HT	TCEA1	-0.311442	8.27566	-21.7981	0.0242904	-39.6644
HT	COPA	0.31138	8.67987	20.1008	0.0264748	-39.8313
HT	NPTN	-0.309722	7.93837	-11.0564	0.0498998	-41.0588
HT	SUCLG1	-0.30896	8.86951	-66.5034	0.00741867	-37.3642
HT	CRYZL1	-0.308772	6.7632	-17.5952	0.0304948	-40.1053
HT	YTHDF2	0.308502	6.77134	14.9833	0.0361639	-40.4356
HT	NDUFV2	0.305509	8.43658	44.8632	0.0112765	-38.1764
HT	MTHFD1	-0.304629	6.04191	-453.145	0.000963046	-33.4038
HT	FLAD1	-0.304235	4.9569	-27.6241	0.0188849	-39.1764
HT	ABHD10	0.302708	6.05904	14.7646	0.0367324	-40.4658
HT	SLC25A6	-0.299291	10.8495	-11.7557	0.0467646	-40.9333
HT	VAMP7	-0.299007	6.44168	-43.6473	0.0116108	-38.2331
HT	MRPS17	0.298797	5.23675	18.4695	0.0289645	-40.0055
HT	PLA2G15	0.298797	5.23675	18.4695	0.0289645	-40.0055
HT	SWAP70	0.298512	7.19426	283063239724433	2.71202e-16	22.6549
HT	HHAT	0.298179	3.85527	13.0253	0.0419516	-40.7231
HT	CCPG1	0.297888	7.33218	15.6192	0.0346041	-40.3502
HT	STARD3	0.297676	5.0605	1.8086e+18	2.423e-20	39.1668
HT	PCDH7	-0.295985	2.74516	-21.6708	0.0244421	-39.6765
HT	SPG7	0.294918	6.78813	279654585573831	2.7472e-16	22.6299
HT	NUDT3	-0.291581	7.07312	-29.2613	0.0177637	-39.0577
HT	PARM1	0.291427	8.24779	189.177	0.00243941	-35.2067
HT	AC068946.2	0.290212	1.77183	19.0939	0.0279598	-39.9371
HT	UFD1	0.289754	7.12508	17.1696	0.0312977	-40.1556
HT	DLD	-0.28973	7.87233	-38.9752	0.0130966	-38.4666
HT	VAMP2	0.289487	7.20636	18.9601	0.0281693	-39.9516
HT	SCFD1	0.288187	5.58598	12.0042	0.0457404	-40.8904
HT	ZNF253	-0.28488	5.31254	-270136525062280	2.85031e-16	22.5585
HT	FBXO4	-0.284721	5.02777	-269985350597939	2.852e-16	22.5573
HT	SHKBP1	0.284721	5.12268	269985350597937	2.852e-16	22.5573
HT	TSPAN4	-0.284194	6.48126	-159.319	0.00292857	-35.5612
HT	CBR4	0.27847	4.91378	26.4344	0.0197896	-39.2671
HT	UBXN2A	-0.278317	5.56784	-16.6575	0.0323199	-40.2179
HT	YAE1	-0.278317	5.56784	-16.6575	0.0323199	-40.2179
HT	AIMP1	-0.276117	6.79632	-39.8921	0.0127767	-38.4187
HT	MTMR14	0.275661	5.8594	14.505	0.0374298	-40.5022
HT	MGLL	-0.267395	5.61825	-18.8687	0.0283143	-39.9615
HT	UBE2H	-0.266587	5.09546	-25.3064	0.0207285	-39.357
HT	ELOA-AS1	-0.266504	3.28203	-252711418691109	3.05987e-16	22.4208
HT	GALNS	-0.266504	3.28203	-252711418691109	3.05987e-16	22.4208
HT	HKDC1	-0.266504	3.28203	-252711418691109	3.05987e-16	22.4208
HT	MFAP1	0.265618	6.90672	1.61382e+18	2.73531e-20	39.1109
HT	PHYHD1	-0.262587	5.88626	-124498432276901	6.49884e-16	20.9596
HT	SNRPG	0.262291	6.27172	11.9603	0.0459183	-40.8979
HT	TMED10	0.261674	9.85029	62.6554	0.00790429	-37.4872
HT	RTKN	0.259575	4.67737	15.631	0.0345765	-40.3487
HT	TXNDC16	-0.258397	3.90241	-88.6463	0.00546436	-36.7712
HT	PRMT2	-0.257395	7.11118	-116.723	0.00407761	-36.2033
HT	NOP14	-0.255197	5.50549	-15.3327	0.0352904	-40.3882
HT	C1RL	0.250708	3.10962	237732820882709	3.2654e-16	22.2947
HT	EGLN1	0.250708	3.10962	237732820882709	3.2654e-16	22.2947
HT	GJA4	0.250708	3.10962	237732820882709	3.2654e-16	22.2947
HT	GSK3A	0.250708	3.10962	237732820882709	3.2654e-16	22.2947
HT	HAUS8	0.250708	3.10962	237732820882709	3.2654e-16	22.2947
HT	KANTR	0.250708	3.10962	237732820882709	3.2654e-16	22.2947
HT	GJA1	0.250128	6.54297	82.7661	0.0058783	-36.9128
HT	API5	0.249951	7.16189	11.0356	0.0499993	-41.0627
HT	NAB2	-0.249934	3.48987	-473997810483326	1.56702e-16	23.719
HT	PEX5	-0.249934	3.48987	-473997810483326	1.56702e-16	23.719
HT	TANGO6	-0.249934	3.48987	-473997810483326	1.56702e-16	23.719
HT	RSRC1	-0.246468	5.44798	-40.035	0.0127282	-38.4113
HT	SKP1	-0.243565	10.9256	-18.0054	0.0297578	-40.0579
HT	NELFCD	-0.242258	6.95492	-11.7668	0.0467179	-40.9313
HT	CIAPIN1	-0.241199	6.36353	-13.6433	0.0399406	-40.628
HT	TAX1BP1	-0.239987	8.98273	-51.1289	0.00981258	-37.9067
HT	FAM133B	-0.23977	6.49377	-11.5217	0.0477703	-40.9745
HT	PSMG4	-0.23482	4.49438	-40.5506	0.0125561	-38.3849
HT	GIMAP1	0.234474	5.01836	48.4206	0.0103974	-38.019
HT	SNRNP35	0.234162	6.32843	90.0158	0.00537596	-36.7395
HT	POLR2G	-0.23389	6.08907	-44.4104	0.0113988	-38.1973
HT	YJU2	-0.232759	4.84148	-14.0162	0.0388152	-40.5726
[truncated: 2,065 more rows]
