# Supplementary material for: A Global Regulatory Network for Dysregulated Gene Expression and Abnormal Metabolic Signaling in Immune Cells in the Microenvironment of Graves’ Disease and Hashimoto’s Thyroiditis
Source: Frontiers journal article supplement (doi:10.3389/fimmu.2022.879824), 2022-05-26
Supplement: Table_2.XLS [file Table_2.XLS]

## Sheet: Sheet1
CellMarker	p_val	avg_log2FC	pct.1	pct.2	p_val_adj	CellType
C1QA	0	3.30558	0.805	0.012	0	Mac
C1QB	0	3.00936	0.776	0.01	0	Mac
TYROBP	0	2.79194	0.954	0.084	0	Mac
MS4A6A	0	1.97304	0.813	0.021	0	Mac
HLA-DRB1	0	3.46127	0.935	0.355	0	Mac
HLA-DRB5	2.15e-114	1.72441	0.311	0.123	5.32e-110	Mac
MRC1	0	1.45506	0.402	0.018	0	Mac
CD68	0	1.57409	0.799	0.034	0	Mac
FCGR3A	0	1.37791	0.519	0.028	0	Mac
HCK	0	0.475007	0.333	0.011	0	Mac
C1QC	0	2.58821	0.747	0.005	0	Mac
AIF1	0	2.41746	0.942	0.054	0	Mac
FCER1G	0	2.47939	0.919	0.065	0	Mac
RNASE1	6.2e-227	1.76884	0.343	0.098	1.53e-222	Mac
CD163	0	1.37472	0.574	0.004	0	Mac
FOLR2	0	0.995926	0.342	0.004	0	Mac
HLA-DRA	0	3.74631	0.943	0.322	0	Mac
F13A1	0	0.906516	0.346	0.002	0	Mac
MS4A4A	0	1.06538	0.484	0.002	0	Mac
PTPRC	0	1.62225	0.912	0.304	0	CD8.T
CD3D	0	1.16966	0.823	0.166	0	CD8.T
CD247	0	0.355971	0.365	0.096	0	CD8.T
IFNG	0	1.34337	0.342	0.024	0	CD8.T
CD52	0	0.861064	0.774	0.274	0	CD8.T
CD3E	0	1.07803	0.833	0.184	0	CD8.T
CD3G	0	0.880125	0.62	0.094	0	CD8.T
CD8A	0	1.06213	0.622	0.08	0	CD8.T
TRBC2	0	1.21584	0.818	0.248	0	CD8.T
CD8B	0	0.935546	0.553	0.054	0	CD8.T
KLRK1	0	1.02756	0.58	0.052	0	CD8.T
CCL5	0	2.5306	0.961	0.235	0	CD8.T
TRAC	0	1.01598	0.771	0.195	0	CD8.T
PTPRC	0	0.581413	0.817	0.365	0	CD4.T
CD3D	0	1.36001	0.869	0.223	0	CD4.T
TRBC2	0	1.7713	0.859	0.297	0	CD4.T
CD3E	0	1.16036	0.87	0.241	0	CD4.T
LCK	0	0.734194	0.581	0.118	0	CD4.T
CD52	0	0.947659	0.85	0.315	0	CD4.T
CD3G	0	0.490658	0.502	0.149	0	CD4.T
TRBC1	0	1.75138	0.544	0.15	0	CD4.T
CD247	0	0.579843	0.477	0.113	0	CD4.T
CD4	0	0.411641	0.313	0.047	0	CD4.T
CD7	0	0.945418	0.661	0.229	0	CD4.T
TRAC	0	2.0275	0.94	0.236	0	CD4.T
